1           Gut microbes and their genes are associated with brain  
2           development and cognitive function in healthy children  
3

4 Kevin S. Bonham [1], Muriel M. K. Bruchhage [2], Sophie Rowland [1], Alexandra R. Volpe [2],  
5 Kellyn Dyer [2], RESONANCE Consortium, Viren D'Sa [2,3], Curtis Huttenhower [4], Sean C. L.  
6 Deoni [2,3,5,6], Vanja Klepac-Ceraj\* [1]

- 7  
8 1. Department of Biological Sciences, Wellesley College, Wellesley, MA, 02481, USA  
9 2. Advanced Baby Imaging Lab, Hasbro Children's Hospital, Rhode Island Hospital, Providence,  
10 RI, 02903, USA  
11 3. Department of Pediatrics, Warren Alpert Medical School at Brown University, Providence, RI,  
12 02912, USA  
13 4. Department of Biostatistics, Harvard T. H. Chan School of Public Health, Boston, MA, USA  
14 5. Department of Radiology, Warren Alpert Medical School at Brown University, Providence, RI,  
15 02912, USA  
16 6. Maternal, Newborn, and Child Health Discovery & Tools, Bill & Melinda Gates Foundation;  
17 Seattle WA, USA

18  
19 ORCID:

20 Kevin S. Bonham: 0000-0003-3200-7533  
21 Muriel M. K. Bruchhage: 0000-0001-9637-0951  
22 Viren D'Sa: 0000-0002-3476-8419  
23 Curtis Huttenhower: 0000-0002-1110-0096  
24 Vanja Klepac-Ceraj: 0000-0001-5387-5706

25  
26 \* Address correspondence to [vklepacc@wellesley.edu](mailto:vklepacc@wellesley.edu)

## 27 Abstract

28 **Both the brain and microbiome of humans develop rapidly in the first years of life,**  
29 **enabling extensive signaling between the gut and central nervous system (dubbed the**  
30 **“microbiome-gut-brain axis”). Emerging evidence implicates gut microorganisms and**  
31 **microbiota composition in cognitive outcomes and neurodevelopmental disorders (e.g.,**  
32 **autism), but the influence of gut microbial metabolism on typical neurodevelopment has**  
33 **not been explored in detail. We investigated the relationship of the microbiome with the**  
34 **neuroanatomy and cognitive function of 281 healthy children in a cross-sectional**  
35 **analysis and demonstrated that differences in gut microbial taxa and gene functions are**  
36 **associated with the size of brain regions and with overall cognitive function. Many**  
37 **species, including *Eubacterium eligens* and *Roseburia hominis*, were associated with**  
38 **higher cognitive function, while some species such as *Ruminococcus gnavus* was more**  
39 **commonly found in children with low cognitive scores. Microbial enzymes involved in the**  
40 **metabolism of neuroactive compounds such as glutamate and GABA, were also**  
41 **associated with structure of the brain, including the first brain regions to develop such**  
42 **as the cerebellum, and with overall cognitive function.**

## 43 Introduction

44 The first years of life are a unique and dynamic period of neurological and cognitive  
45 development. Throughout childhood, a child’s brain undergoes remarkable anatomical,  
46 microstructural, organizational, and functional change. By age 5, a child’s brain has reached  
47 over 85% of its adult size, has achieved near-adult levels of myelination, and the pattern of  
48 axonal connections has been established (Silbereis et al., 2016). This development is  
49 profoundly affected by the child’s environment and early life exposures (Fox et al., 2010). The  
50 first years of life also witness dramatic changes in the gut microbiome. The gut microbial

51 community is seeded at birth, and develops over the course of the first year from a low-diversity  
52 community dominated by Firmicutes and Proteobacteria, to a more diverse, adult-like  
53 microbiome upon the introduction of solid food. This microbial community development is also  
54 shaped by the environment, with factors such as mode of delivery and diet (breast milk vs  
55 formula) known to have lasting effects on community composition (Bäckhed et al., 2015;  
56 Dominguez-Bello et al., 2010).

57         The gut, the gut microbiome, and the central nervous system are intricately linked  
58 through a system known as the gut-microbiome-brain axis (Clarke et al., 2013), and differences  
59 in microbial communities are associated with, and in some cases cause, changes in  
60 neurocognitive development (Flannery et al., 2020; Gao et al., 2019) and the outcome of  
61 neurological disorders such as autism (Sharon et al., 2019). However, the study of the  
62 relationships between environmental exposures, neurocognitive development, and the gut  
63 microbiome during neurotypical development remains in its infancy (Carlson et al., 2018;  
64 Sordillo et al., 2019).

65         Here, we focused on the relationship of microbial taxa and metabolic potential in the  
66 structural development of the brain and in neurocognition. In particular, we show that microbial  
67 taxa as well as genes with neuroactive potential, specifically genes encoding enzymes for the  
68 metabolism of glutamate and GABA, are associated with the size of important brain regions and  
69 with differences in cognitive function. Understanding the relationship of intestinal GABA and  
70 glutamate metabolism may be particularly important to understanding the role of the gut  
71 microbiome in early childhood cognitive development, as together, GABA and glutamate  
72 response neurons make up the main cerebellar output pathways (Carletti & Rossi, 2008;  
73 Hoshino, 2006). The cerebellum is one of the earliest brain regions to develop (Leto et al., 2016;  
74 Silbereis et al., 2016), making it especially vulnerable for disorder and disease (S.H. Wang et  
75 al., 2014). Understanding how the gut microbiome of healthy children interacts with the complex

76 metabolism of these and other neuroactive molecules will be critical in understanding the  
77 etiology of cognitive disorders and how to promote healthy neurological development.

## 78 Results and Discussion

79 To examine the relationships between early childhood gut microbiome and  
80 neurocognitive development, we collected stool samples from 281 children enrolled in the  
81 RESONANCE study of child development, part of the NIH initiative Environmental influences on  
82 Child Health Outcomes (ECHO; Gillman & Blaisdell, 2018), an observational study of healthy  
83 and neurotypical brain development that spans the fetal and infant to adolescent life stages,  
84 combining neuroimaging (magnetic resonance imaging, MRI), neurocognitive assessments, and  
85 rich demographic, socioeconomic, family and medical history information (Table 1). As an initial  
86 characterization step, we used shotgun metagenomic sequencing to generate taxonomic and  
87 functional profiles for each of our child fecal samples. Participant age was the greatest driver of  
88 both taxonomic and functional diversity, as expected (Figure 1b-c; Koenig et al., 2011). Children  
89 under one year of age formed a distinct cluster from older children, characterized by high  
90 aerobic load and low alpha (within-sample) diversity (Figure 1b, Supplementary Figure 2).  
91 Comparing children's profiles with those of unrelated pregnant women (n=251), the  
92 microbiomes of children over two years old were similar to those of adults (Supplementary  
93 Figure 1a, 2a).

94 Table 1. Baseline characteristics of ECHO RESONANCE participants

|                                          |     |
|------------------------------------------|-----|
| <b>Subjects (n)</b>                      | 281 |
| <b>Under 1yo (n)</b>                     | 60  |
| <b>Over 2yo (n)</b>                      | 192 |
| <b>With high resolution scan (n)</b>     | 141 |
| <b>With cognitive function score (n)</b> | 274 |

|                                             |             |
|---------------------------------------------|-------------|
| <b>Both scan and cognitive function (n)</b> | 134         |
| <b>Non-white (%)</b>                        | 56.77       |
| <b>Mixed race (%)</b>                       | 18.8        |
| <b>Age in years (mean, SD)</b>              | 4.45, 3.5   |
| <b>BMI (mean, SD)</b>                       | 16.81, 2.61 |
| <b>Maternal SES (mean, SD)</b>              | 5.93, 1.0   |

96 Figure 1

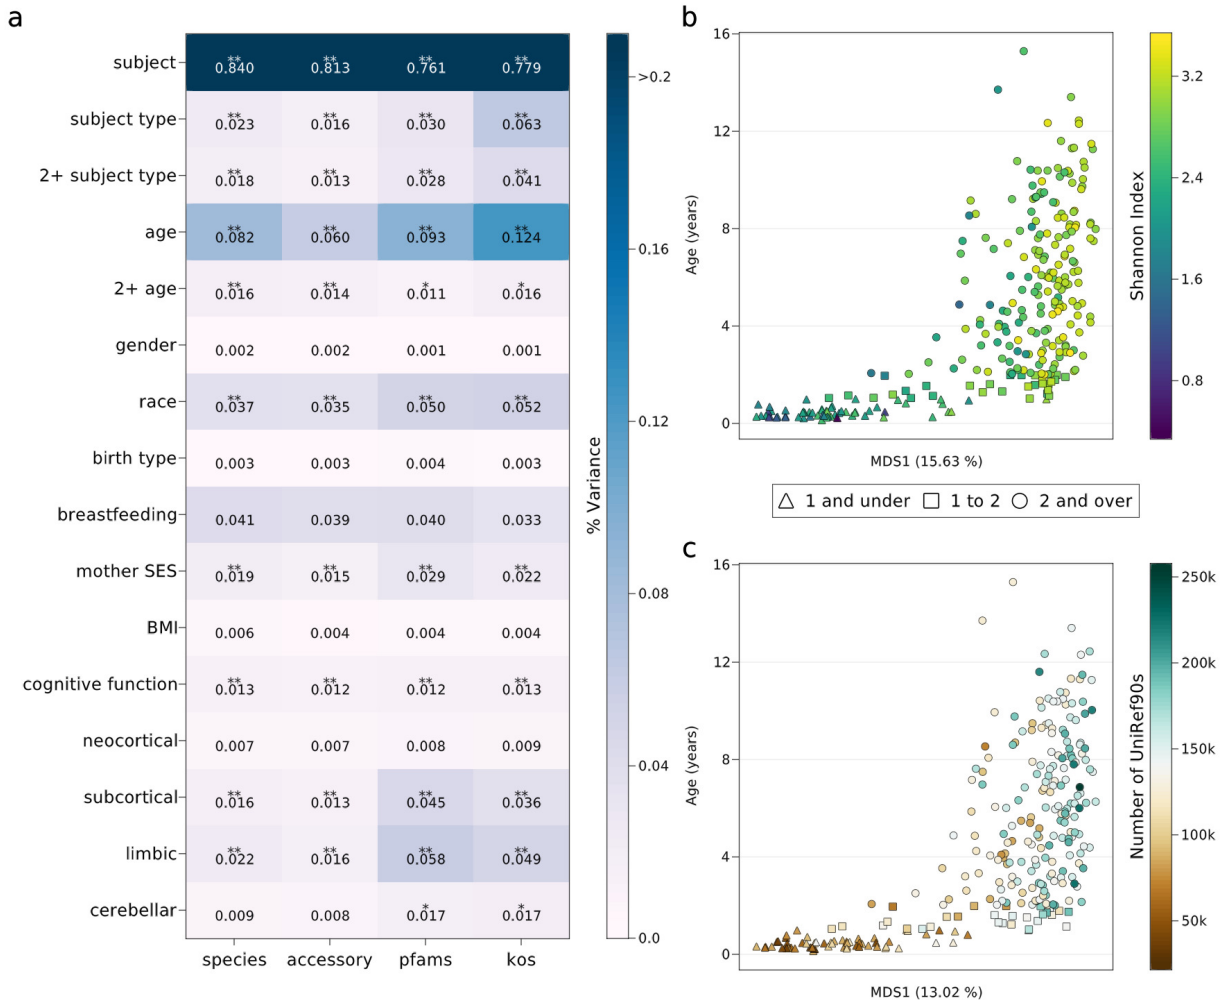

97

98 **The gut microbiome of healthy children changes dramatically over the first 2 years of life**  
 99 **and is associated with neurocognitive measures**

100 Stool samples from children aged 0 to 15 years old (N=281, one sample per subject) were  
 101 analyzed with associated cognitive evaluations (N=274), structural and functional brain imaging  
 102 (N=141), and rich demographic and environmental exposure information. **b**, PERMANOVA  
 103 analysis for selected subject metadata vs. pairwise Bray-Curtis dissimilarity for species-level  
 104 taxonomic or functional profiles. Functional profiles include Kegg-Orthology (KO), Pfams or  
 105 accessory UniRef90s; subject and subject type include all subjects, 2+ includes only children  
 106 over 2 years old (N=192), others include all children for which the measure was available  
 107 (breastfeeding: N=60, maternal socioeconomic status (SES): N=261, BMI: N=226); stars  
 108 indicate significance after Benjamini-Hochberg FDR correction. (\* < 0.1, \*\* < 0.01, \*\*\* < 0.001).  
 109 **c**, First principle coordinate (PCoA) based on Bray-Curtis dissimilarity in taxonomic (species)  
 110 profiles vs age; younger children cluster away from older children, and are lower in diversity. **d**,  
 111 same as (c) using the first PCo axis for functional profiles (UniRef90 accessory genes) after

112 removing gene families that were present in >90% of subjects in a given age group; variation is  
113 driven by similar effects as for taxonomic profiles.

114 As in previous adult and infant cohorts, functional beta diversity was generally lower than  
115 taxonomic diversity (Supplementary Figure 2a), suggesting that healthy guts select for similar  
116 gene functions even when different species contribute those functions. However, this  
117 interpretation may be complicated by the fact that as many as 50% of sequencing reads in  
118 some samples are not mapped to any of the reference genes used, and are thus unclassified  
119 (Supplementary Figure 2b). Interestingly, although children under 1 (N=60) tended to have  
120 substantially fewer species and, therefore, fewer total genes (Figure 1c, right), those genes  
121 tended to be better characterized, likely because the taxa present in this age-range are better  
122 represented in experimental studies (Supplementary Figure 2b, Vatanen et al., 2018).  
123 Consistent with previous studies of adult cohorts from industrialized countries (Tett et al., 2019),  
124 another major driver of variation visible from principal coordinates analysis was the presence of  
125 *Prevotella copri* (Supplementary Figure 3). Like samples from very young children, samples  
126 from children with *P. copri* had reduced diversity compared with samples from other children  
127 and pregnant mothers without *P. copri* (Supplementary Figure 2, 3). Overall, these results are  
128 consistent with prior studies of adult and childhood gut microbiomes (Koenig et al., 2011; Lloyd-  
129 Price et al., 2017).

130 To assess the potential role of the microbiome in neuro-structural and -cognitive  
131 development, child stool samples were collected alongside MRI (N=141) and age-appropriate  
132 neurocognitive evaluations (N=274) (Figure 2a). Measures of overall cognitive ability (e.g.,  
133 intelligence quotient, IQ; Mullen & others, 1995; Wechsler, 1949), MRI measures of cortical  
134 volume and morphometry, as well as other potentially relevant clinical metadata, were  
135 compared to taxonomic and functional profile dissimilarity by PERMANOVA (Anderson, 2017;  
136 McArdle & Anderson, 2001). Consistent with previous studies, inter-individual (subject) variation  
137 accounted for the majority of variation in microbial taxonomic and functional profiles ([84%,  
138 78%],  $q < 0.01$ ) (Figure 1b, Supplementary Table 1). Subject type (child or mother) accounted  
139 for a moderate amount of variation ([2%, 6%]  $q < 0.01$ ), but this effect dropped when children



140 under 2 years of age were excluded, suggesting that age, rather than subject type, is  
141 responsible for driving much of the taxonomic and functional variation. Among children's  
142 samples, age accounted for 8-12% of variation in both taxonomic and functional profiles, but this  
143 effect also largely disappeared when children under 2 were excluded (Figure 1b, Supplementary  
144 Table 1), suggesting that the age effect is primarily driven by the enormous changes in the  
145 microbiome over the first year.

146         Microbiome taxonomic and functional variation was also associated with small but  
147 significant differences in several neurocognitive measures including age-appropriate measures  
148 of cognitive ability (1.3%,  $q < 0.01$ ,  $N=274$ ). We found significant associations between regional  
149 brain volumes and microbial taxonomic and functional variation, including the sizes of the  
150 cerebellum ([0.9%, 1.8%],  $q$  [NS,  $< 0.01$ ]), the subcortex ([1.7%, 3.7%],  $q < 0.01$ ), and limbic  
151 regions ([2.3%, 4.9%],  $q < 0.01$ ) ( $N = 141$  for all high resolution scans) after correcting for the  
152 effect of age on brain volume. These results are on par with the magnitude of previously  
153 reported drivers of microbial diversity such as antibiotics use and Inflammatory Bowel Disease  
154 diagnosis (Lloyd-Price et al., 2019), and suggest that there is a strong relationship between the  
155 gut microbiome and neurocognitive development (Figure 1b). Though the direction of causality  
156 cannot be determined, experimental models of brain development and neurological disorders  
157 have demonstrated that microbes in the intestine may have causal effects on the functioning of  
158 the central nervous system through their metabolic action or interactions with the immune  
159 system (Blacher et al., 2019; Clarke et al., 2013; Gao et al., 2019; Hsiao et al., 2013).

160 Figure 2

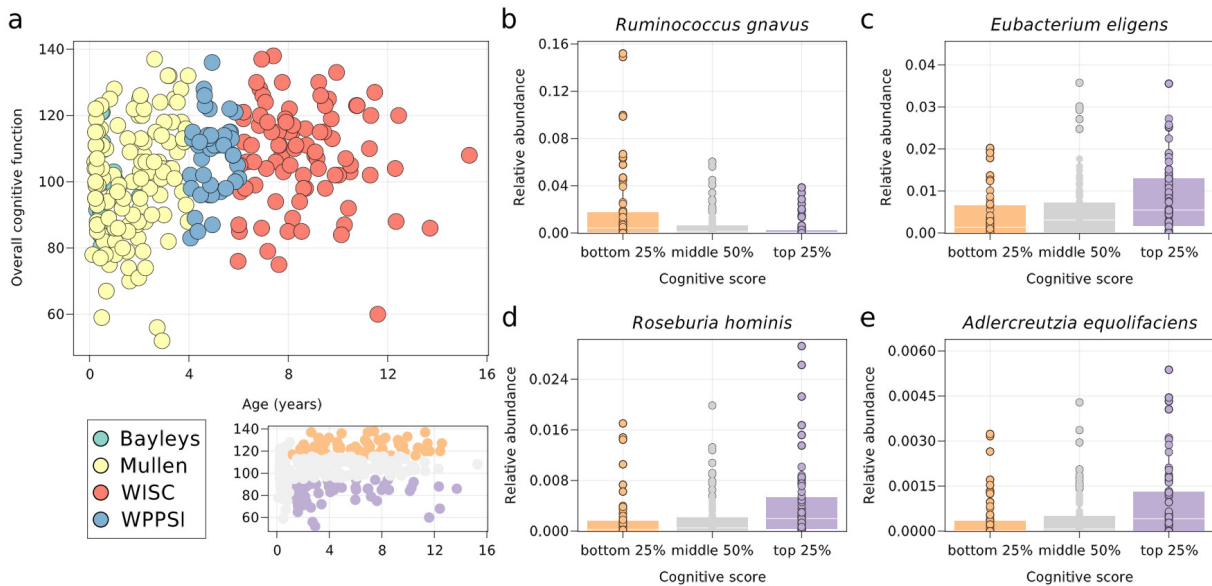

161

162 **Differences in microbial taxa are associated with cognitive function in neurotypical**  
163 **children**

164 **a**, Cognitive function measured using age-appropriate IQ-like tests, allowing comparison across  
165 multiple developmental stages. Inset is the same as a, but shows top (orange, N=66) and  
166 bottom (purple, N=65) quartiles for children older than 1 year used in b-e. **b-e**, relative  
167 abundances of taxa that are significantly ( $q < 0.1$  after FDR correction) different in the top and  
168 bottom quartiles of cognitive score for children over 1 year.

169

170 Table 2. Gut microbial taxa associated with cognitive scores in children  
171 older than 1 year.

| Species                                    | Association | Lower 25% median | Upper 25% median | N samples | P value  | Q value  |
|--------------------------------------------|-------------|------------------|------------------|-----------|----------|----------|
| <i>Ruminococcus gnavus</i>                 | -           | 0.004214         | 0.000492         | 102       | 0.000055 | 0.016523 |
| <i>Coprococcus sp ART55 1</i>              | +           | < 1E-6           | < 1E-6           | 25        | 0.000320 | 0.032148 |
| <i>Eubacterium eligens</i>                 | +           | 0.001354         | 0.005472         | 101       | 0.000238 | 0.032148 |
| <i>Coprobacillus unclassified</i>          | -           | 0.000205         | < 1E-6           | 53        | 0.000619 | 0.044157 |
| <i>Roseburia hominis</i>                   | +           | 0.000279         | 0.002013         | 95        | 0.000738 | 0.044157 |
| <i>Adlercreutzia equolifaciens</i>         | +           | < 1E-6           | 0.000413         | 71        | 0.000935 | 0.044157 |
| <i>Lachnospiraceae bacterium 2 1 58FAA</i> | -           | < 1E-6           | < 1E-6           | 47        | 0.001027 | 0.044157 |
| <i>Clostridium symbiosum</i>               | -           | 0.000092         | < 1E-6           | 55        | 0.001825 | 0.068654 |

172

173 To determine if any specific microbial taxa may be associated with these differences, we  
174 divided children into quartiles for cognitive function score, and tested for differences in microbe  
175 abundance in the top and bottom quartiles (Table 2; Figure 2b-e; Supplementary Table 2). Due  
176 to the rapid changes in the microbiomes of very young children, those under 1 year old were  
177 excluded from this analysis. Several taxa were significantly different in the upper and lower  
178 quartiles (Mann-Whitney U test,  $q < 0.1$  after FDR correction). For example, *Ruminococcus*  
179 *gnavus*, which has previously been associated with depression in children (Chahwan et al.,  
180 2019) and inflammatory bowel disease (Hall et al., 2017; Schirmer et al., 2019), was more  
181 abundant in children that tested in the lowest quartile for cognitive function (Figure 2b). By  
182 contrast, *Eubacterium eligens* (Figure 1c) and *Roseburia hominis* (Figure 1d), both of which  
183 have been associated with regulating inflammation in the gut (Chung et al., 2016; Patterson et  
184 al., 2017), were more abundant in the stool samples of children from the top quartile of cognitive  
185 scores. *Adlercreutzia equolifaciens* (Figure 1e) has been linked to autism and multiple sclerosis  
186 (Chen et al., 2016; Li et al., 2019) and was also more abundant in children with higher cognitive  
187 scores. Multivariate linear models including all children over the age of 1 year showed similar  
188 trends in these taxa, but none were significant after FDR correction.

189 While identifying important taxa in cognitive development is useful to direct further  
190 research, the effects of microbes on their hosts are ultimately driven by their metabolism. To  
191 investigate potential mechanisms through which the gut microbiome might affect neurostructural  
192 and neurocognitive development in infants and young children, we focused on a group of  
193 microbial genes that code for enzymes that metabolize neuroactive compounds (Valles-Colomer  
194 et al., 2019). We analyzed the association of each of these gene sets with our neurocognitive  
195 measures using feature set enrichment analysis (FSEA; de Leeuw et al., 2016; Metwally et al.,  
196 2018; Figure 3a, Supplementary Table 3). Briefly, we calculated the Pearson correlation  
197 between the relative abundance of all identified UniRef90 gene families with each  
198 neurocognitive measure, then calculated the Mann-Whitney U statistic for each potentially

199 neuroactive subset. Using this analysis, we observed that catabolic and anabolic pathways for  
200 several molecules known to be important in the developing brain were significantly associated  
201 with overall cognitive function scores and the size of brain subregions.

202 Figure 3

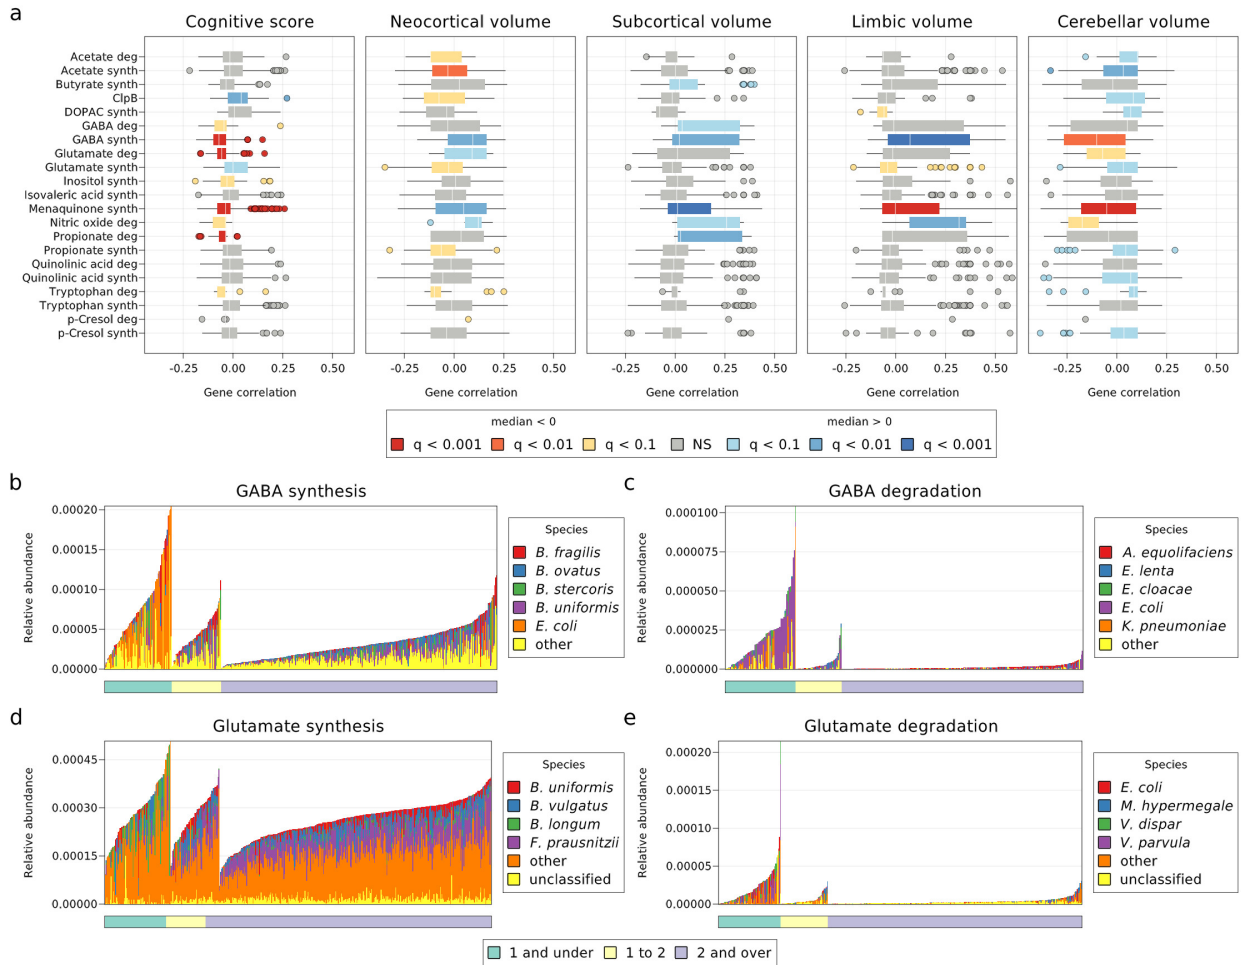

203

204 **Microbial genes involved in the metabolism of neuroactive compounds are associated**  
 205 **with cognition and brain structure**

206 **a**, FSEA analysis for gene sets with neuroactive potential (see Methods); many gene sets with  
 207 neuroactive potential are associated with cognitive function and brain structure. **b-e**, Species  
 208 contributions of GABA and glutamate synthesis and degradation gene sets; the microbiomes of  
 209 children over 1 year old have substantially lower capacity for degradation of glutamate and  
 210 GABA. There is a clear shift in glutamate synthesis from *B. longum* and other *Bifidobacterium*  
 211 spp. to *F. prausnitzii* and *Bacteroides* spp. (common species in adult microbiomes) when  
 212 comparing children under 1 year old to older children.

213 In particular, microbial genes for GABA synthesis were positively associated with  
214 neocortical ( $q < 0.01$ , Figure 3a, Supplementary Table 3), subcortical ( $q < 0.01$ ), and limbic ( $q <$   
215  $0.001$ ) volume, and negatively associated with cerebellar volume ( $q < 0.01$ ) and overall  
216 cognitive function ( $q < 1e-5$ ). Interestingly, GABA degradation genes were also positively  
217 associated with the size of the subcortex and negatively associated with cognitive function ( $q <$   
218  $0.05$ ). This may be due to higher GABA synthesis selecting for the ability to catabolize this  
219 molecule, making it difficult to assess how actual GABA concentrations in the gut are associated  
220 with brain development. GABA synthesis genes that could be assigned to specific taxa were  
221 found primarily in *E. coli* in children under 1 year old, and in several different *Bacteroides*  
222 species in older children (Figure 3b). GABA degradation in younger children was also seen  
223 extensively in *E. coli*, but declines dramatically in abundance in older kids (Figure 3c).

224 Unlike the metabolism of GABA, glutamate synthesis and degradation genes have an  
225 inverse relationship with neurocognitive measures (Figure 3a, Supplementary Table 3). The  
226 glutamate degradation gene set was negatively associated with cognitive function ( $q < 1e-4$ )  
227 and cerebellar volume ( $q < 0.05$ ) and positively associated with the size of the neocortex ( $q <$   
228  $0.05$ ), while glutamate synthesis was marginally negatively associated with overall cognitive  
229 function and the size of the neocortex, while positively associated with the size of the  
230 cerebellum ( $q < 0.05$ ). However, it remains difficult to predict how gut concentrations of  
231 glutamate might be related to microbial metabolism; while it might be intuitive to expect that  
232 higher glutamate synthesis and lower glutamate degradation would lead to higher gut  
233 concentrations of glutamate, it might also be the case that lower glutamate concentrations  
234 select for microbes that can synthesize it and against those that break it down. Glutamate is  
235 also far more prevalent in the diet and can be rapidly metabolized by gut epithelial cells, making  
236 the relationship between gut concentrations and microbial metabolism even more complex  
237 (Reeds et al., 2000). Unsurprisingly, as glutamate is an essential amino acid, Glu synthesis

238 genes were found in a variety of taxa, including the most common taxa for each age group (eg.  
239 *B. longum* for children under 1 year old and *F. prausnitzii* in older children; Figure 3d).

240 This is the first look at an ongoing study of child neurocognitive and microbiome  
241 development. Using cross-sectional data, we have shown that differences in gut microbial taxa  
242 and genes are associated with the structural development of the brain and with cognitive  
243 development. In addition, we have shown that particular microbial gene sets with neuroactive  
244 potential are associated with neurocognitive development, thus perhaps playing a direct role in  
245 the gut luminal exposure of children to neuroactive metabolites. Glutamate and GABA  
246 metabolism are of particular interest, since these are critical molecules for signaling from the  
247 cerebellum during early development and learning, and the cerebellum is one of the first brain  
248 structures to develop (Leto et al., 2016; Silbereis et al., 2016). Neurodevelopmental disorders,  
249 such as autism spectrum disorder, have been associated with an imbalance of the  
250 inhibitory/excitatory system regulated by glutamate and GABA, with recent evidence suggesting  
251 an impaired conversion of glutamate to GABA in the disorder (Fatemi et al., 2012), and  
252 understanding these pathological outcomes will depend on a deeper understanding of  
253 developmental exposures in neurotypically developing children.

254 This study is ongoing, and we are collecting additional clinical data such as resting state  
255 functional brain imaging, participant genetic profiles, lead exposure, air quality data and  
256 nutritional information to understand how the environment, microbiome, and biological  
257 development interact to shape neurocognition. Future studies assessing gut metabolite pools  
258 combined with MR spectroscopic methods to quantify concentrations of neurotransmitters such  
259 as GABA and glutamate-glutamine in the brain, as well humanized mouse models and  
260 longitudinal human data, will provide further insight into the interactions of microbial metabolism  
261 and neurocognitive development. As we continue to follow these subjects, we will be able to  
262 identify how early-life microbial exposures, including exposures *in utero*, might affect future  
263 neurocognitive outcomes.



## 264 Materials and methods

### 265 Cohort description

266 Data used in this study were drawn from the ongoing longitudinal RESONANCE study of  
267 healthy and neurotypical brain and cognitive development, based at Brown University in  
268 Providence, RI, USA. From the RESONANCE cohort, 281 typically-developing children between  
269 the ages of 47 days and 15 years old and 251 healthy unrelated pregnant women were selected  
270 for analysis in this study. Only one stool sample per subject was analyzed; either the sample  
271 associated with the first time point collected or the first stool sample with an associated  
272 neurocognitive measure for the same time point. General participant demographics are provided  
273 in **Table 1**. Complete metadata are available in Supplementary Table 4, with children being  
274 representative of the RI population. As a broad background, children in the RESONANCE cohort  
275 were born full-term (>37 weeks gestation) with height and weight average for gestational age, and  
276 from uncomplicated singleton pregnancies. Children with known major risk factors for  
277 developmental abnormalities at enrollment were excluded. In addition to screening at the time of  
278 enrollment, on-going screening for worrisome behaviors using validated tools was performed to  
279 identify at-risk children and remove them from subsequent analysis.

### 280 Additional data collection

281 Demographic and other non-biospecimen data such as race and ethnicity, parental  
282 education and occupation, feeding behavior (breast- and formula-feeding), child weight and  
283 height, were collected through questionnaires or direct examination as appropriate. All data  
284 were collected at every assessment visit, scheduled on the same day of the MRI scan or at  
285 least within 2 weeks of the scan date.

## 286 Approval for human subject research

287 All procedures for this study were approved by the local institutional review board at  
288 Rhode Island Hospital, and all experiments adhered to the regulation of the review board.  
289 Written informed consent was obtained from all parents or legal guardians of enrolled  
290 participants.

## 291 Stool sample collection and handling

292 Stool samples (n=532) were collected by parents in OMR-200 tubes (OMNIgene GUT,  
293 DNA Genotek, Ottawa, Ontario, Canada), immediately stored on ice, and brought within 24 hrs  
294 to the lab in RI where they were immediately frozen at -80°C. Stool samples were not collected  
295 if the infant had taken antibiotics within the last two weeks.

## 296 DNA extraction and sequencing of metagenomes

297 All processing of the samples was done at Wellesley College (Wellesley, MA). Nucleic  
298 acids were extracted from stool samples using the RNeasy PowerMicrobiome kit automated on  
299 the QIAcube (Qiagen, Germantown, MD), excluding the DNA degradation steps. Extracted DNA  
300 was sequenced at the Integrated Microbiome Resource (IMR, Dalhousie University, NS, Canada).

301 Shotgun metagenomic sequencing was performed on all samples. A pooled library (max  
302 96 samples per run) was prepared using the Illumina Nextera Flex Kit for MiSeq and NextSeq  
303 from 1 ng of each sample. Samples were then pooled onto a plate and sequenced on the  
304 Illumina NextSeq 550 platform using 150+150 bp paired-end “high output” chemistry, generating  
305 ~400 million raw reads and ~120 Gb of sequence.

## 306 Computational methods, statistical analyses and data availability

307 Raw and processed data (excluding PHI) is available through SRA and Zenodo.org  
308 (Bonham et al., 2020). All code used for statistical and other analysis is available on github  
309 (Kevin Bonham, 2020). Software packages included vegan (R package) for PERMANOVAs,  
310 MultivariateStats.jl for MDS analysis, HypothesisTests.jl for Mann-Whitney U tests (used in  
311 FSEA analysis), MultipleTesting.jl for false discovery rate correction, and Makie.jl for plotting.

312 FSEA analyses (de Leeuw et al., 2016) were performed by assessing the Pearson  
313 correlation of the relative abundance of each gene with a given measure (brain region volume or  
314 cognitive score) across all subjects. The difference between genes within a gene set to all other  
315 genes measured was assessed using Mann-Whitney U, a non-parametric test of the null  
316 hypothesis that the correlation of a random gene from within the gene set has an equal  
317 probability of being higher or lower than a random gene from outside the gene set against the  
318 alternative hypothesis that these probabilities are not equal.

319 Metagenomic data were analyzed using the bioBakery (McIver et al., 2018) family of tools  
320 with default parameters. Briefly, KneadData (v0.7.1) was used to trim and filter raw sequence  
321 reads and to separate human reads from bacterial sequences. Samples that passed quality  
322 control were taxonomically profiled to the species level using MetaPhlan2 (v2.7.7). Stratified  
323 functional profiles were generated by HUMAnN2 (v0.11.1).

## 324 MRI Acquisition and data processing

325 Structural T<sub>1</sub>-weighted MRI scans were acquired on a 3T Siemens Trio scanner with a  
326 12-channel head RF array, preprocessed using a multistep registration procedure. Cortical  
327 reconstruction and volumetric segmentation were performed with the Freesurfer image analysis  
328 suite, which is documented and freely available for download online  
329 (<http://surfer.nmr.mgh.harvard.edu/>). Brain regions were divided into neocortex, cerebellum,

330 limbic and subcortical regions (for more details on acquisition and processing, see extended  
331 methods).

## 332 Neurocognitive assessments

333 Overall cognitive function was defined by the Early Learning Composite as assessed via  
334 the Mullen Scales of Early Learning (MSEL; Mullen & others, 1995), a standardized and  
335 population normed tool for assessing fine and gross motor, expressive and receptive language,  
336 and visual reception functioning in children from birth through 68 months of age.

337 The third edition of the Bayley Scales of Infant and Toddler Development (Bayley's III) is  
338 a standard series of measures used primarily to assess the development of infants and toddlers,  
339 ranging from 1 to 42 months of age (Bayley, 2006).

340 The Wechsler Intelligence Quotient for Children (WISC; Wechsler, 2012) is an  
341 individually administered standard intelligence test for children aged 6 to 16 years. It derives a  
342 full scale intelligence quotient (IQ) score, which we used to assess overall cognitive functioning.

343 The fourth edition of the Wechsler Preschool and Primary Scale of Intelligence (WPPSI-  
344 IV; Wechsler, 2012) is an individually administered standard intelligence test for children aged 2  
345 years 6 months to 7 years 7 months, trying to meet the increasing need for the assessment of  
346 preschoolers. Just as the WISC, it derives a full scale IQ score, which we used to assess overall  
347 cognitive functioning.

## 348 Acknowledgments

349 The authors would like to thank Christopher Loiselle and Jennifer Beauchemin for assistance  
350 with biospecimen and metadata collection, Nisreen Abo-Sido for sample preparation and DNA  
351 extraction, Katherine Lemon and Libusha Kelly for edits and comments, and Julius Krumbiegel  
352 for extensive help with figure generation code.

353 This work was supported by the National Institutes of Health (UH3 ODD023313 and R01  
354 MH087510).

## 355 References

- 356 Anderson, M. J. (2017). Permutational Multivariate Analysis of Variance (PERMANOVA). In  
357 *Wiley StatsRef: Statistics Reference Online* (pp. 1–15). American Cancer Society.  
358 <https://doi.org/10.1002/9781118445112.stat07841>
- 359 Bäckhed, F., Roswall, J., Peng, Y., Feng, Q., Jia, H., Kovatcheva-Datchary, P., Li, Y., Xia, Y.,  
360 Xie, H., Zhong, H., Khan, M. T., Zhang, J., Li, J., Xiao, L., Al-Aama, J., Zhang, D., Lee,  
361 Y. S., Kotowska, D., Colding, C., ... Wang, J. (2015). Dynamics and stabilization of the  
362 human gut microbiome during the first year of life. *Cell Host & Microbe*, *17*(5), 690–703.  
363 <https://doi.org/10.1016/j.chom.2015.04.004>
- 364 Bayley, N. (2006). *Bayley scales of infant and toddler development*. PsychCorp, Pearson.
- 365 Blacher, E., Bashiardes, S., Shapiro, H., Rothschild, D., Mor, U., Dori-Bachash, M., Kleimeyer,  
366 C., Moresi, C., Harnik, Y., Zur, M., Zabari, M., Brik, R. B.-Z., Kviatcovsky, D., Zmora, N.,  
367 Cohen, Y., Bar, N., Levi, I., Amar, N., Mehlman, T., ... Elinav, E. (2019). Potential roles  
368 of gut microbiome and metabolites in modulating ALS in mice. *Nature*, *572*(7770), 474–  
369 480. <https://doi.org/10.1038/s41586-019-1443-5>
- 370 Bonham, K. S., Rowland, S., Bruchage, M., Volpe, L., Dyer, K., D'Sa, V., Deoni, S., & Klepac-  
371 Ceraj, V. (2020). *Data for “Gut microbial genes are associated with neurocognition and*  
372 *brain development in healthy children”* [Data set]. Zenodo.  
373 <https://doi.org/10.5281/zenodo.3633793>
- 374 Carletti, B., & Rossi, F. (2008). Neurogenesis in the cerebellum. *The Neuroscientist*, *14*(1), 91–  
375 100.
- 376 Carlson, A. L., Xia, K., Azcarate-Peril, M. A., Goldman, B. D., Ahn, M., Styner, M. A.,

- 377 Thompson, A. L., Geng, X., Gilmore, J. H., & Knickmeyer, R. C. (2018). Infant gut  
378 microbiome associated with cognitive development. *Biological Psychiatry*, 83(2), 148–  
379 159. <https://doi.org/10.1016/j.biopsych.2017.06.021>
- 380 Chahwan, B., Kwan, S., Isik, A., van Hemert, S., Burke, C., & Roberts, L. (2019). Gut feelings: A  
381 randomised, triple-blind, placebo-controlled trial of probiotics for depressive symptoms.  
382 *Journal of Affective Disorders*, 253, 317–326. <https://doi.org/10.1016/j.jad.2019.04.097>
- 383 Chen, J., Chia, N., Kalari, K. R., Yao, J. Z., Novotna, M., Paz Soldan, M. M., Luckey, D. H.,  
384 Marietta, E. V., Jeraldo, P. R., Chen, X., Weinshenker, B. G., Rodriguez, M., Kantarci, O.  
385 H., Nelson, H., Murray, J. A., & Mangalam, A. K. (2016). Multiple sclerosis patients have  
386 a distinct gut microbiota compared to healthy controls. *Scientific Reports*, 6(1), 28484.  
387 <https://doi.org/10.1038/srep28484>
- 388 Chung, W. S. F., Walker, A. W., Louis, P., Parkhill, J., Vermeiren, J., Bosscher, D., Duncan, S.  
389 H., & Flint, H. J. (2016). Modulation of the human gut microbiota by dietary fibres occurs  
390 at the species level. *BMC Biology*, 14(1), 3. <https://doi.org/10.1186/s12915-015-0224-3>
- 391 Clarke, G., Grenham, S., Scully, P., Fitzgerald, P., Moloney, R. D., Shanahan, F., Dinan, T. G.,  
392 & Cryan, J. F. (2013). The microbiome-gut-brain axis during early life regulates the  
393 hippocampal serotonergic system in a sex-dependent manner. *Molecular Psychiatry*,  
394 18(6), 666–673. <https://doi.org/10.1038/mp.2012.77>
- 395 de Leeuw, C. A., Neale, B. M., Heskes, T., & Posthuma, D. (2016). The statistical properties of  
396 gene-set analysis. *Nature Reviews Genetics*, 17(6), 353–364.  
397 <https://doi.org/10.1038/nrg.2016.29>
- 398 Dominguez-Bello, M. G., Costello, E. K., Contreras, M., Magris, M., Hidalgo, G., Fierer, N., &  
399 Knight, R. (2010). Delivery mode shapes the acquisition and structure of the initial  
400 microbiota across multiple body habitats in newborns. *Proceedings of the National*  
401 *Academy of Sciences*, 107(26), 11971–11975. <https://doi.org/10.1073/pnas.1002601107>
- 402 Fatemi, S. H., Aldinger, K. A., Ashwood, P., Bauman, M. L., Blaha, C. D., Blatt, G. J., Chauhan,

- 403 A., Chauhan, V., Dager, S. R., Dickson, P. E., & others. (2012). Consensus paper:  
404 Pathological role of the cerebellum in autism. *The Cerebellum*, 11(3), 777–807.
- 405 Flannery, J. E., Stagaman, K., Burns, A. R., Hickey, R. J., Roos, L. E., Giuliano, R. J., Fisher, P.  
406 A., & Sharpton, T. J. (2020). Gut feelings begin in childhood: The gut metagenome  
407 correlates with early environment, caregiving, and behavior. *MBio*, 11(1).  
408 <https://doi.org/10.1128/mBio.02780-19>
- 409 Fox, S. E., Levitt, P., & Nelson, C. A. (2010). How the timing and quality of early experiences  
410 influence the development of brain architecture. *Child Development*, 81(1), 28–40.  
411 <https://doi.org/10.1111/j.1467-8624.2009.01380.x>
- 412 Gao, W., Salzwedel, A. P., Carlson, A. L., Xia, K., Azcarate-Peril, M. A., Styner, M. A.,  
413 Thompson, A. L., Geng, X., Goldman, B. D., Gilmore, J. H., & Knickmeyer, R. C. (2019).  
414 Gut microbiome and brain functional connectivity in infants-a preliminary study focusing  
415 on the amygdala. *Psychopharmacology*. <https://doi.org/10.1007/s00213-018-5161-8>
- 416 Gillman, M. W., & Blaisdell, C. J. (2018). Environmental influences on child health outcomes, a  
417 research program of the NIH. *Current Opinion in Pediatrics*, 30(2), 260.
- 418 Hall, A. B., Yassour, M., Sauk, J., Garner, A., Jiang, X., Arthur, T., Lagoudas, G. K., Vatanen,  
419 T., Fornelos, N., Wilson, R., Bertha, M., Cohen, M., Garber, J., Khalili, H., Gevers, D.,  
420 Ananthakrishnan, A. N., Kugathasan, S., Lander, E. S., Blainey, P., ... Huttenhower, C.  
421 (2017). A novel Ruminococcus gnavus clade enriched in inflammatory bowel disease  
422 patients. *Genome Medicine*, 9(1), 103. <https://doi.org/10.1186/s13073-017-0490-5>
- 423 Hoshino, M. (2006). Molecular mechanisms underlying glutamatergic vs. GABAergic neuronal  
424 subtype specification in the cerebellum. *Seikagaku. The Journal of Japanese*  
425 *Biochemical Society*, 78(2), 130.
- 426 Hsiao, E. Y., McBride, S. W., Hsien, S., Sharon, G., Hyde, E. R., McCue, T., Codelli, J. A.,  
427 Chow, J., Reisman, S. E., Petrosino, J. F., Patterson, P. H., & Mazmanian, S. K. (2013).  
428 Microbiota modulate behavioral and physiological abnormalities associated with

- 429 neurodevelopmental disorders. *Cell*, 155(7), 1451–1463.
- 430 <https://doi.org/10.1016/j.cell.2013.11.024>
- 431 Kevin Bonham. (2020). *Klepac-Ceraj-Lab/resonance\_paper1: Zenodo Release*. Zenodo.
- 432 <https://doi.org/10.5281/zenodo.3648677>
- 433 Koenig, J. E., Spor, A., Scalfone, N., Fricker, A. D., Stombaugh, J., Knight, R., Angenent, L. T.,  
434 & Ley, R. E. (2011). Succession of microbial consortia in the developing infant gut  
435 microbiome. *Proceedings of the National Academy of Sciences*, 108(Supplement 1),  
436 4578–4585. <https://doi.org/10.1073/pnas.1000081107>
- 437 Leto, K., Arancillo, M., Becker, E. B., Buffo, A., Chiang, C., Ding, B., Dobyns, W. B., Dusart, I.,  
438 Haldipur, P., Hatten, M. E., & others. (2016). Consensus paper: Cerebellar development.  
439 *The Cerebellum*, 15(6), 789–828.
- 440 Li, N., Yang, J., Zhang, J., Liang, C., Wang, Y., Chen, B., Zhao, C., Wang, J., Zhang, G., Zhao,  
441 D., Liu, Y., Zhang, L., Yang, J., Li, G., Gai, Z., Zhang, L., & Zhao, G. (2019). Correlation  
442 of gut microbiome between ASD children and mothers and potential biomarkers for risk  
443 assessment. *Genomics, Proteomics & Bioinformatics*, 17(1), 26–38.  
444 <https://doi.org/10.1016/j.gpb.2019.01.002>
- 445 Lloyd-Price, J., Arze, C., Ananthakrishnan, A. N., Schirmer, M., Avila-Pacheco, J., Poon, T. W.,  
446 Andrews, E., Ajami, N. J., Bonham, K. S., Brislawn, C. J., Casero, D., Courtney, H.,  
447 Gonzalez, A., Graeber, T. G., Hall, A. B., Lake, K., Landers, C. J., Mallick, H., Plichta, D.  
448 R., ... Huttenhower, C. (2019). Multi-omics of the gut microbial ecosystem in  
449 inflammatory bowel diseases. *Nature*, 569(7758), 655–662.  
450 <https://doi.org/10.1038/s41586-019-1237-9>
- 451 Lloyd-Price, J., Mahurkar, A., Rahnavard, G., Crabtree, J., Orvis, J., Hall, A. B., Brady, A.,  
452 Creasy, H. H., McCracken, C., Giglio, M. G., McDonald, D., Franzosa, E. A., Knight, R.,  
453 White, O., & Huttenhower, C. (2017). Strains, functions and dynamics in the expanded  
454 Human Microbiome Project. *Nature*, 550(7674), 61–66.



- 455 <https://doi.org/10.1038/nature23889>
- 456 McArdle, B. H., & Anderson, M. J. (2001). Fitting Multivariate Models to Community Data: A  
457 Comment on Distance-Based Redundancy Analysis. *Ecology*, 82(1), 290–297.  
458 [https://doi.org/10.1890/0012-9658\(2001\)082\[0290:FMMTCD\]2.0.CO;2](https://doi.org/10.1890/0012-9658(2001)082[0290:FMMTCD]2.0.CO;2)
- 459 McIver, L. J., Abu-Ali, G., Franzosa, E. A., Schwager, R., Morgan, X. C., Waldron, L., Segata,  
460 N., & Huttenhower, C. (2018). bioBakery: A meta'omic analysis environment.  
461 *Bioinformatics (Oxford, England)*, 34(7), 1235–1237.  
462 <https://doi.org/10.1093/bioinformatics/btx754>
- 463 Metwally, A. A., Aldirawi, H., & Yang, J. (2018). *A review on probabilistic models used in*  
464 *microbiome studies*.  
465 [http://indigo.uic.edu:8080/bitstream/handle/10027/22858/Yang\\_CIS2018.pdf?sequence=](http://indigo.uic.edu:8080/bitstream/handle/10027/22858/Yang_CIS2018.pdf?sequence=1&isAllowed=y)  
466 [1&isAllowed=y](http://indigo.uic.edu:8080/bitstream/handle/10027/22858/Yang_CIS2018.pdf?sequence=1&isAllowed=y)
- 467 Mullen, E. M., & others. (1995). *Mullen scales of early learning*. AGS Circle Pines, MN.
- 468 Patterson, A. M., Mulder, I. E., Travis, A. J., Lan, A., Cerf-Bensussan, N., Gaboriau-Routhiau,  
469 V., Garden, K., Logan, E., Delday, M. I., Coutts, A. G. P., Monnais, E., Ferraria, V. C.,  
470 Inoue, R., Grant, G., & Aminov, R. I. (2017). Human Gut Symbiont *Roseburia hominis*  
471 Promotes and Regulates Innate Immunity. *Frontiers in Immunology*, 8.  
472 <https://doi.org/10.3389/fimmu.2017.01166>
- 473 Reeds, P. J., Burrin, D. G., Stoll, B., & Jahoor, F. (2000). Intestinal Glutamate Metabolism. *The*  
474 *Journal of Nutrition*, 130(4), 978S-982S. <https://doi.org/10.1093/jn/130.4.978S>
- 475 Schirmer, M., Garner, A., Vlamakis, H., & Xavier, R. J. (2019). Microbial genes and pathways in  
476 inflammatory bowel disease. *Nature Reviews Microbiology*, 17(8), 497–511.  
477 <https://doi.org/10.1038/s41579-019-0213-6>
- 478 Sharon, G., Cruz, N. J., Kang, D.-W., Gandal, M. J., Wang, B., Kim, Y.-M., Zink, E. M., Casey,  
479 C. P., Taylor, B. C., Lane, C. J., Bramer, L. M., Isern, N. G., Hoyt, D. W., Noecker, C.,  
480 Sweredoski, M. J., Moradian, A., Borenstein, E., Jansson, J. K., Knight, R., ...

- 481 Mazmanian, S. K. (2019). Human Gut Microbiota from Autism Spectrum Disorder  
482 Promote Behavioral Symptoms in Mice. *Cell*, 177(6), 1600-1618.e17.  
483 <https://doi.org/10.1016/j.cell.2019.05.004>
- 484 Silbereis, J. C., Pochareddy, S., Zhu, Y., Li, M., & Sestan, N. (2016). The cellular and molecular  
485 landscapes of the developing human central nervous system. *Neuron*, 89(2), 248–268.
- 486 Sordillo, J. E., Korrick, S., Laranjo, N., Carey, V., Weinstock, G. M., Gold, D. R., O'Connor, G.,  
487 Sandel, M., Bacharier, L. B., Beigelman, A., Zeiger, R., Litonjua, A. A., & Weiss, S. T.  
488 (2019). Association of the Infant Gut Microbiome With Early Childhood  
489 Neurodevelopmental Outcomes: An Ancillary Study to the VDAART Randomized Clinical  
490 Trial. *JAMA Netw Open*, 2(3), e190905.  
491 <https://doi.org/10.1001/jamanetworkopen.2019.0905>
- 492 Tett, A., Huang, K. D., Asnicar, F., Fehlner-Peach, H., Pasolli, E., Karcher, N., Armanini, F.,  
493 Manghi, P., Bonham, K., Zolfo, M., De Filippis, F., Magnabosco, C., Bonneau, R.,  
494 Lusingu, J., Amuasi, J., Reinhard, K., Rattei, T., Boulund, F., Engstrand, L., ... Segata,  
495 N. (2019). *The Prevotella copri complex comprises four distinct clades that are*  
496 *underrepresented in Westernised populations.* <https://doi.org/10.1101/600593>
- 497 Valles-Colomer, M., Falony, G., Darzi, Y., Tigchelaar, E. F., Wang, J., Tito, R. Y., Schiweck, C.,  
498 Kurilshikov, A., Joossens, M., Wijnenga, C., Claes, S., Van Oudenhove, L., Zhernakova,  
499 A., Vieira-Silva, S., & Raes, J. (2019). The neuroactive potential of the human gut  
500 microbiota in quality of life and depression. *Nature Microbiology*, 4(4), 623–632.  
501 <https://doi.org/10.1038/s41564-018-0337-x>
- 502 Vatanen, T., Franzosa, E. A., Schwager, R., Tripathi, S., Arthur, T. D., Vehik, K., Lernmark, Å.,  
503 Hagopian, W. A., Rewers, M. J., She, J.-X., Toppari, J., Ziegler, A.-G., Akolkar, B.,  
504 Krischer, J. P., Stewart, C. J., Ajami, N. J., Petrosino, J. F., Gevers, D., Lähdesmäki, H.,  
505 ... Xavier, R. J. (2018). The human gut microbiome in early-onset type 1 diabetes from  
506 the TEDDY study. *Nature*, 562(7728), 589–594. <https://doi.org/10.1038/s41586-018->

507            0620-2

508    Wang, S. S.-H., Kloth, A. D., & Badura, A. (2014). The cerebellum, sensitive periods, and  
509            autism. *Neuron*, 83(3), 518–532.

510    Wechsler, D. (1949). *Wechsler intelligence scale for children*.

511    Wechsler, D. (2012). Wechsler preschool and primary scale of intelligence—Fourth edition. *The*  
512            *Psychological Corporation San Antonio, TX*.

513

514

515 Supplemental Figures

516 Supplementary Figure 1

## Supplementary Figure 1

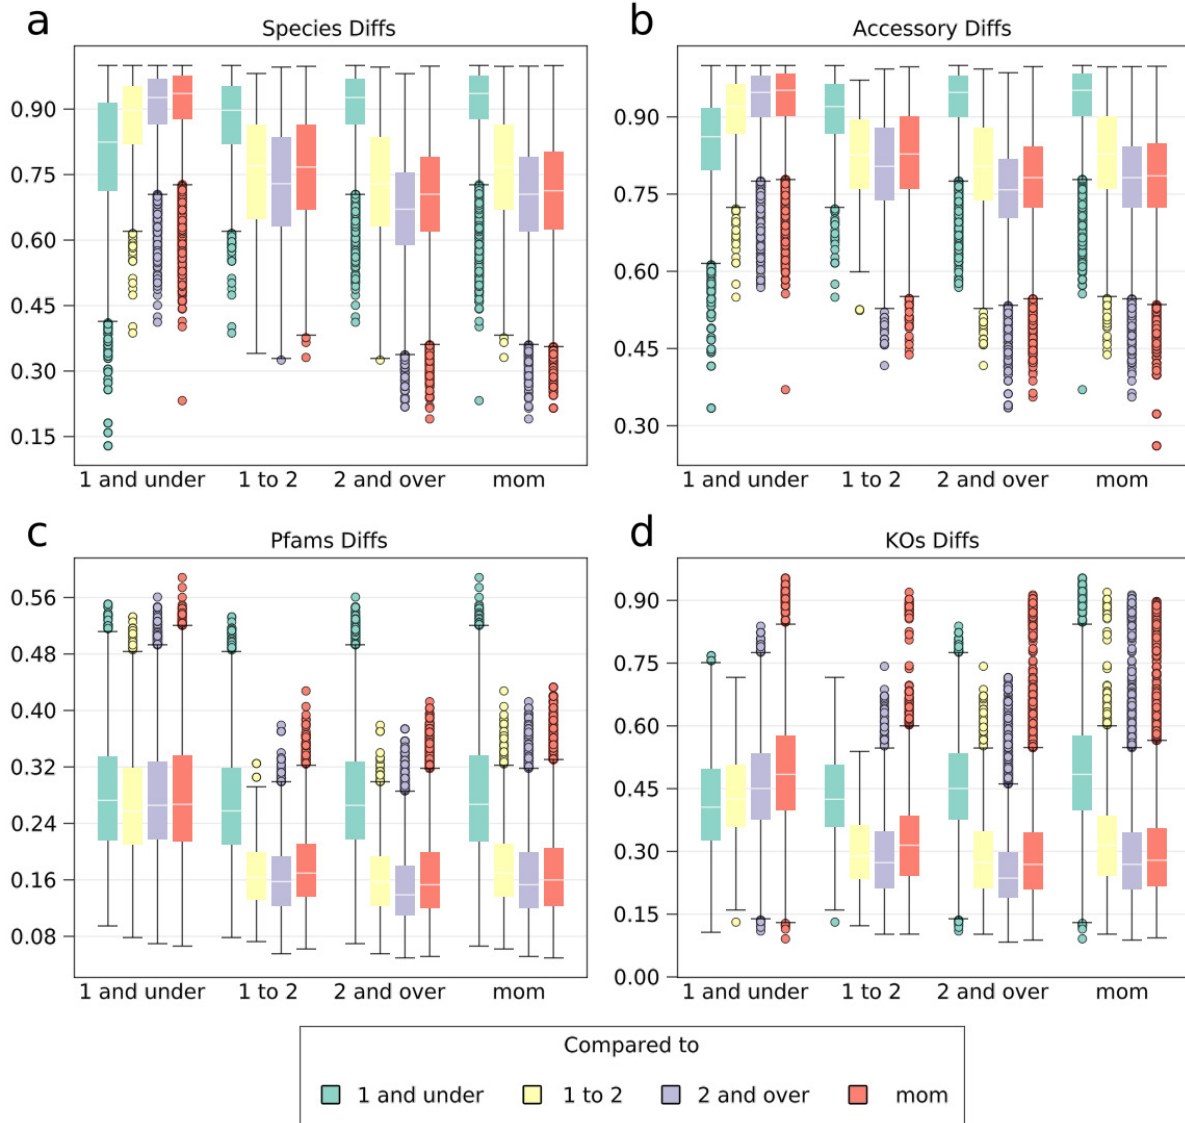

517

518

Supplementary Figure 2

## Supplementary Figure 2

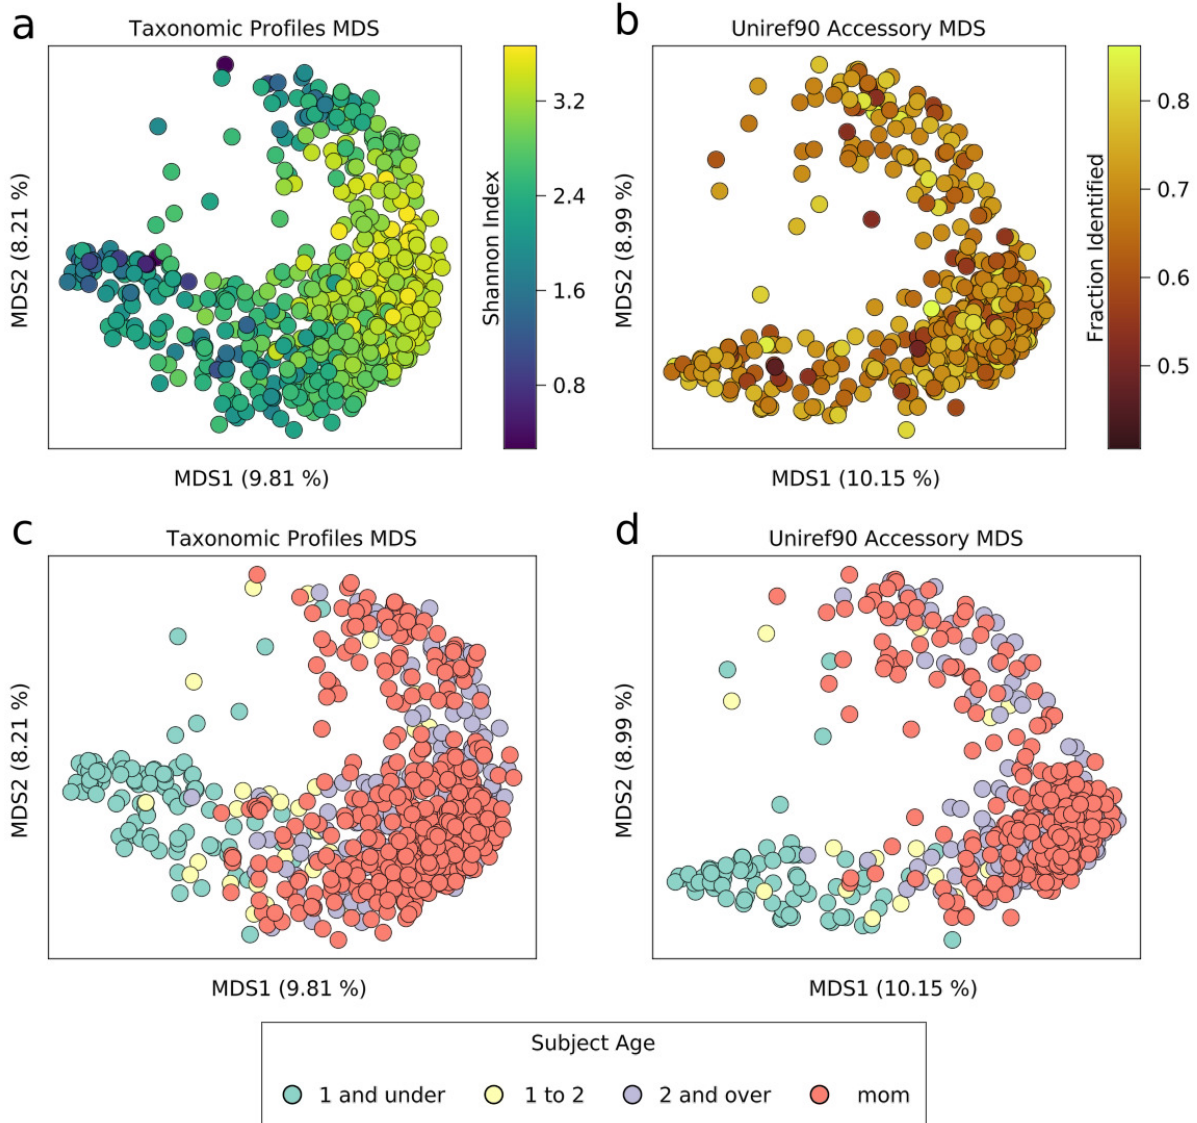

519

520 Supplementary Figure 3

## Supplementary Figure 3

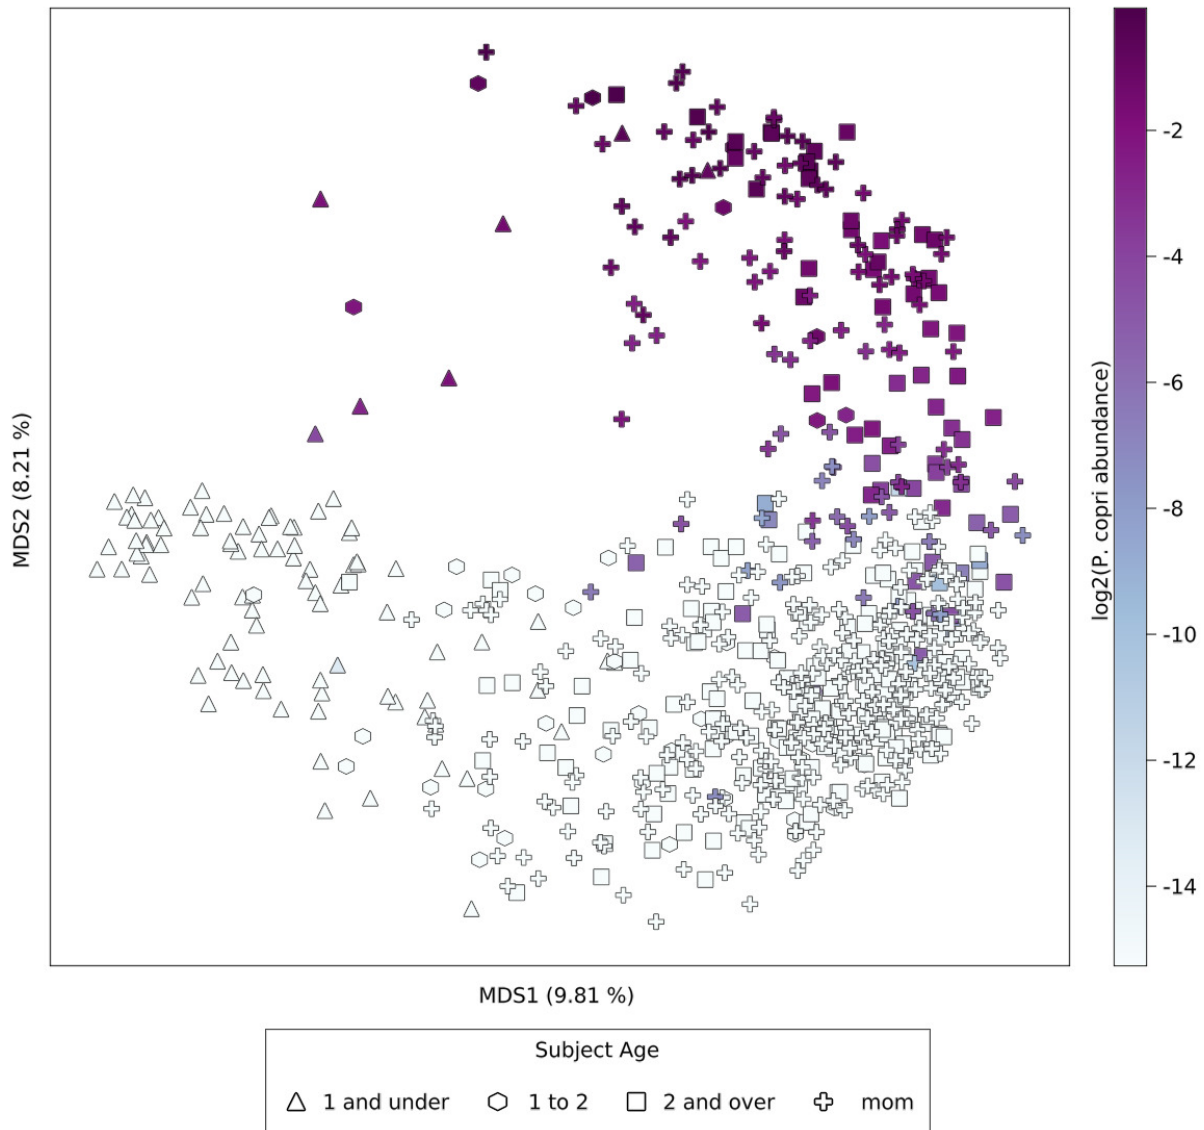

522 Supplementary Figure 4

## Supplementary Figure 4

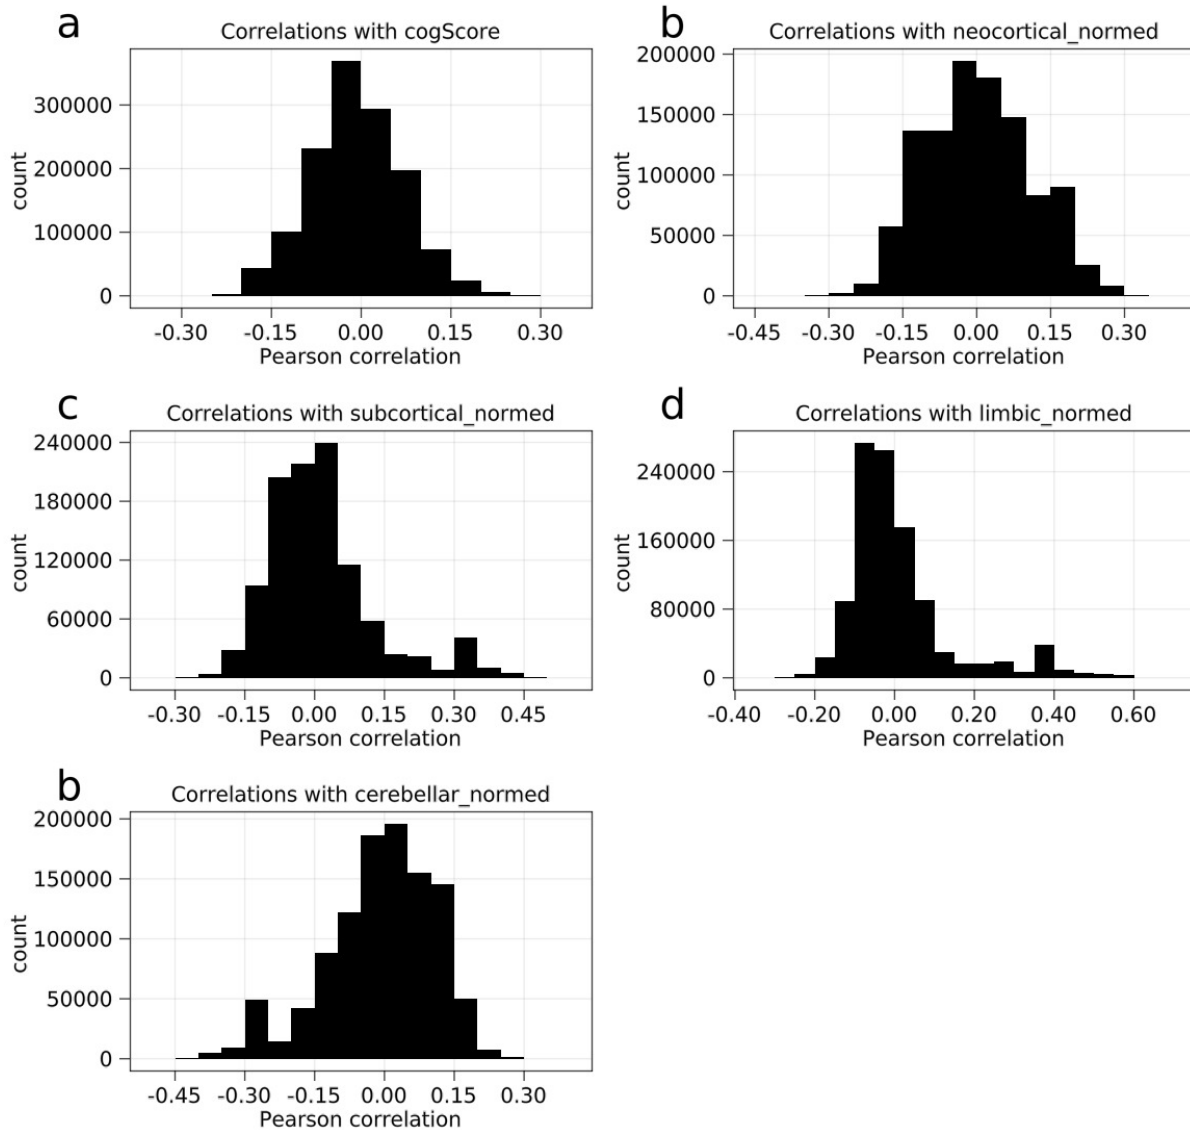

a

|                    |                     |                     |                     |                     |
|--------------------|---------------------|---------------------|---------------------|---------------------|
| subject            | 0.840 <sup>**</sup> | 0.813 <sup>**</sup> | 0.761 <sup>**</sup> | 0.779 <sup>**</sup> |
| subject type       | 0.023 <sup>**</sup> | 0.016 <sup>**</sup> | 0.030 <sup>**</sup> | 0.063 <sup>**</sup> |
| 2+ subject type    | 0.018 <sup>**</sup> | 0.013 <sup>**</sup> | 0.028 <sup>**</sup> | 0.041 <sup>**</sup> |
| age                | 0.082 <sup>**</sup> | 0.060 <sup>**</sup> | 0.093 <sup>**</sup> | 0.124 <sup>**</sup> |
| 2+ age             | 0.016 <sup>**</sup> | 0.014 <sup>**</sup> | 0.011 <sup>*</sup>  | 0.016 <sup>*</sup>  |
| gender             | 0.002               | 0.002               | 0.001               | 0.001               |
| race               | 0.037 <sup>**</sup> | 0.035 <sup>**</sup> | 0.050 <sup>**</sup> | 0.052 <sup>**</sup> |
| birth type         | 0.003               | 0.003               | 0.004               | 0.003               |
| breastfeeding      | 0.041               | 0.039               | 0.040               | 0.033               |
| mother SES         | 0.019 <sup>**</sup> | 0.015 <sup>**</sup> | 0.029 <sup>**</sup> | 0.022 <sup>**</sup> |
| BMI                | 0.006               | 0.004               | 0.004               | 0.004               |
| cognitive function | 0.013 <sup>**</sup> | 0.012 <sup>**</sup> | 0.012 <sup>**</sup> | 0.013 <sup>**</sup> |
| neocortical        | 0.007               | 0.007               | 0.008               | 0.009               |
| subcortical        | 0.016 <sup>**</sup> | 0.013 <sup>**</sup> | 0.045 <sup>**</sup> | 0.036 <sup>**</sup> |
| limbic             | 0.022 <sup>**</sup> | 0.016 <sup>**</sup> | 0.058 <sup>**</sup> | 0.049 <sup>**</sup> |
| cerebellar         | 0.009               | 0.008               | 0.017 <sup>*</sup>  | 0.017 <sup>*</sup>  |
|                    | species             | accessory           | pfams               | kos                 |

bioRxiv preprint doi: <https://doi.org/10.1101/2020.02.13.944181>; this version posted June 6, 2020. The copyright holder for this preprint (which was not certified by peer review) is the author/funder, who has granted bioRxiv a license to display the preprint in perpetuity. It is made available under aCC-BY 4.0 International license.

b

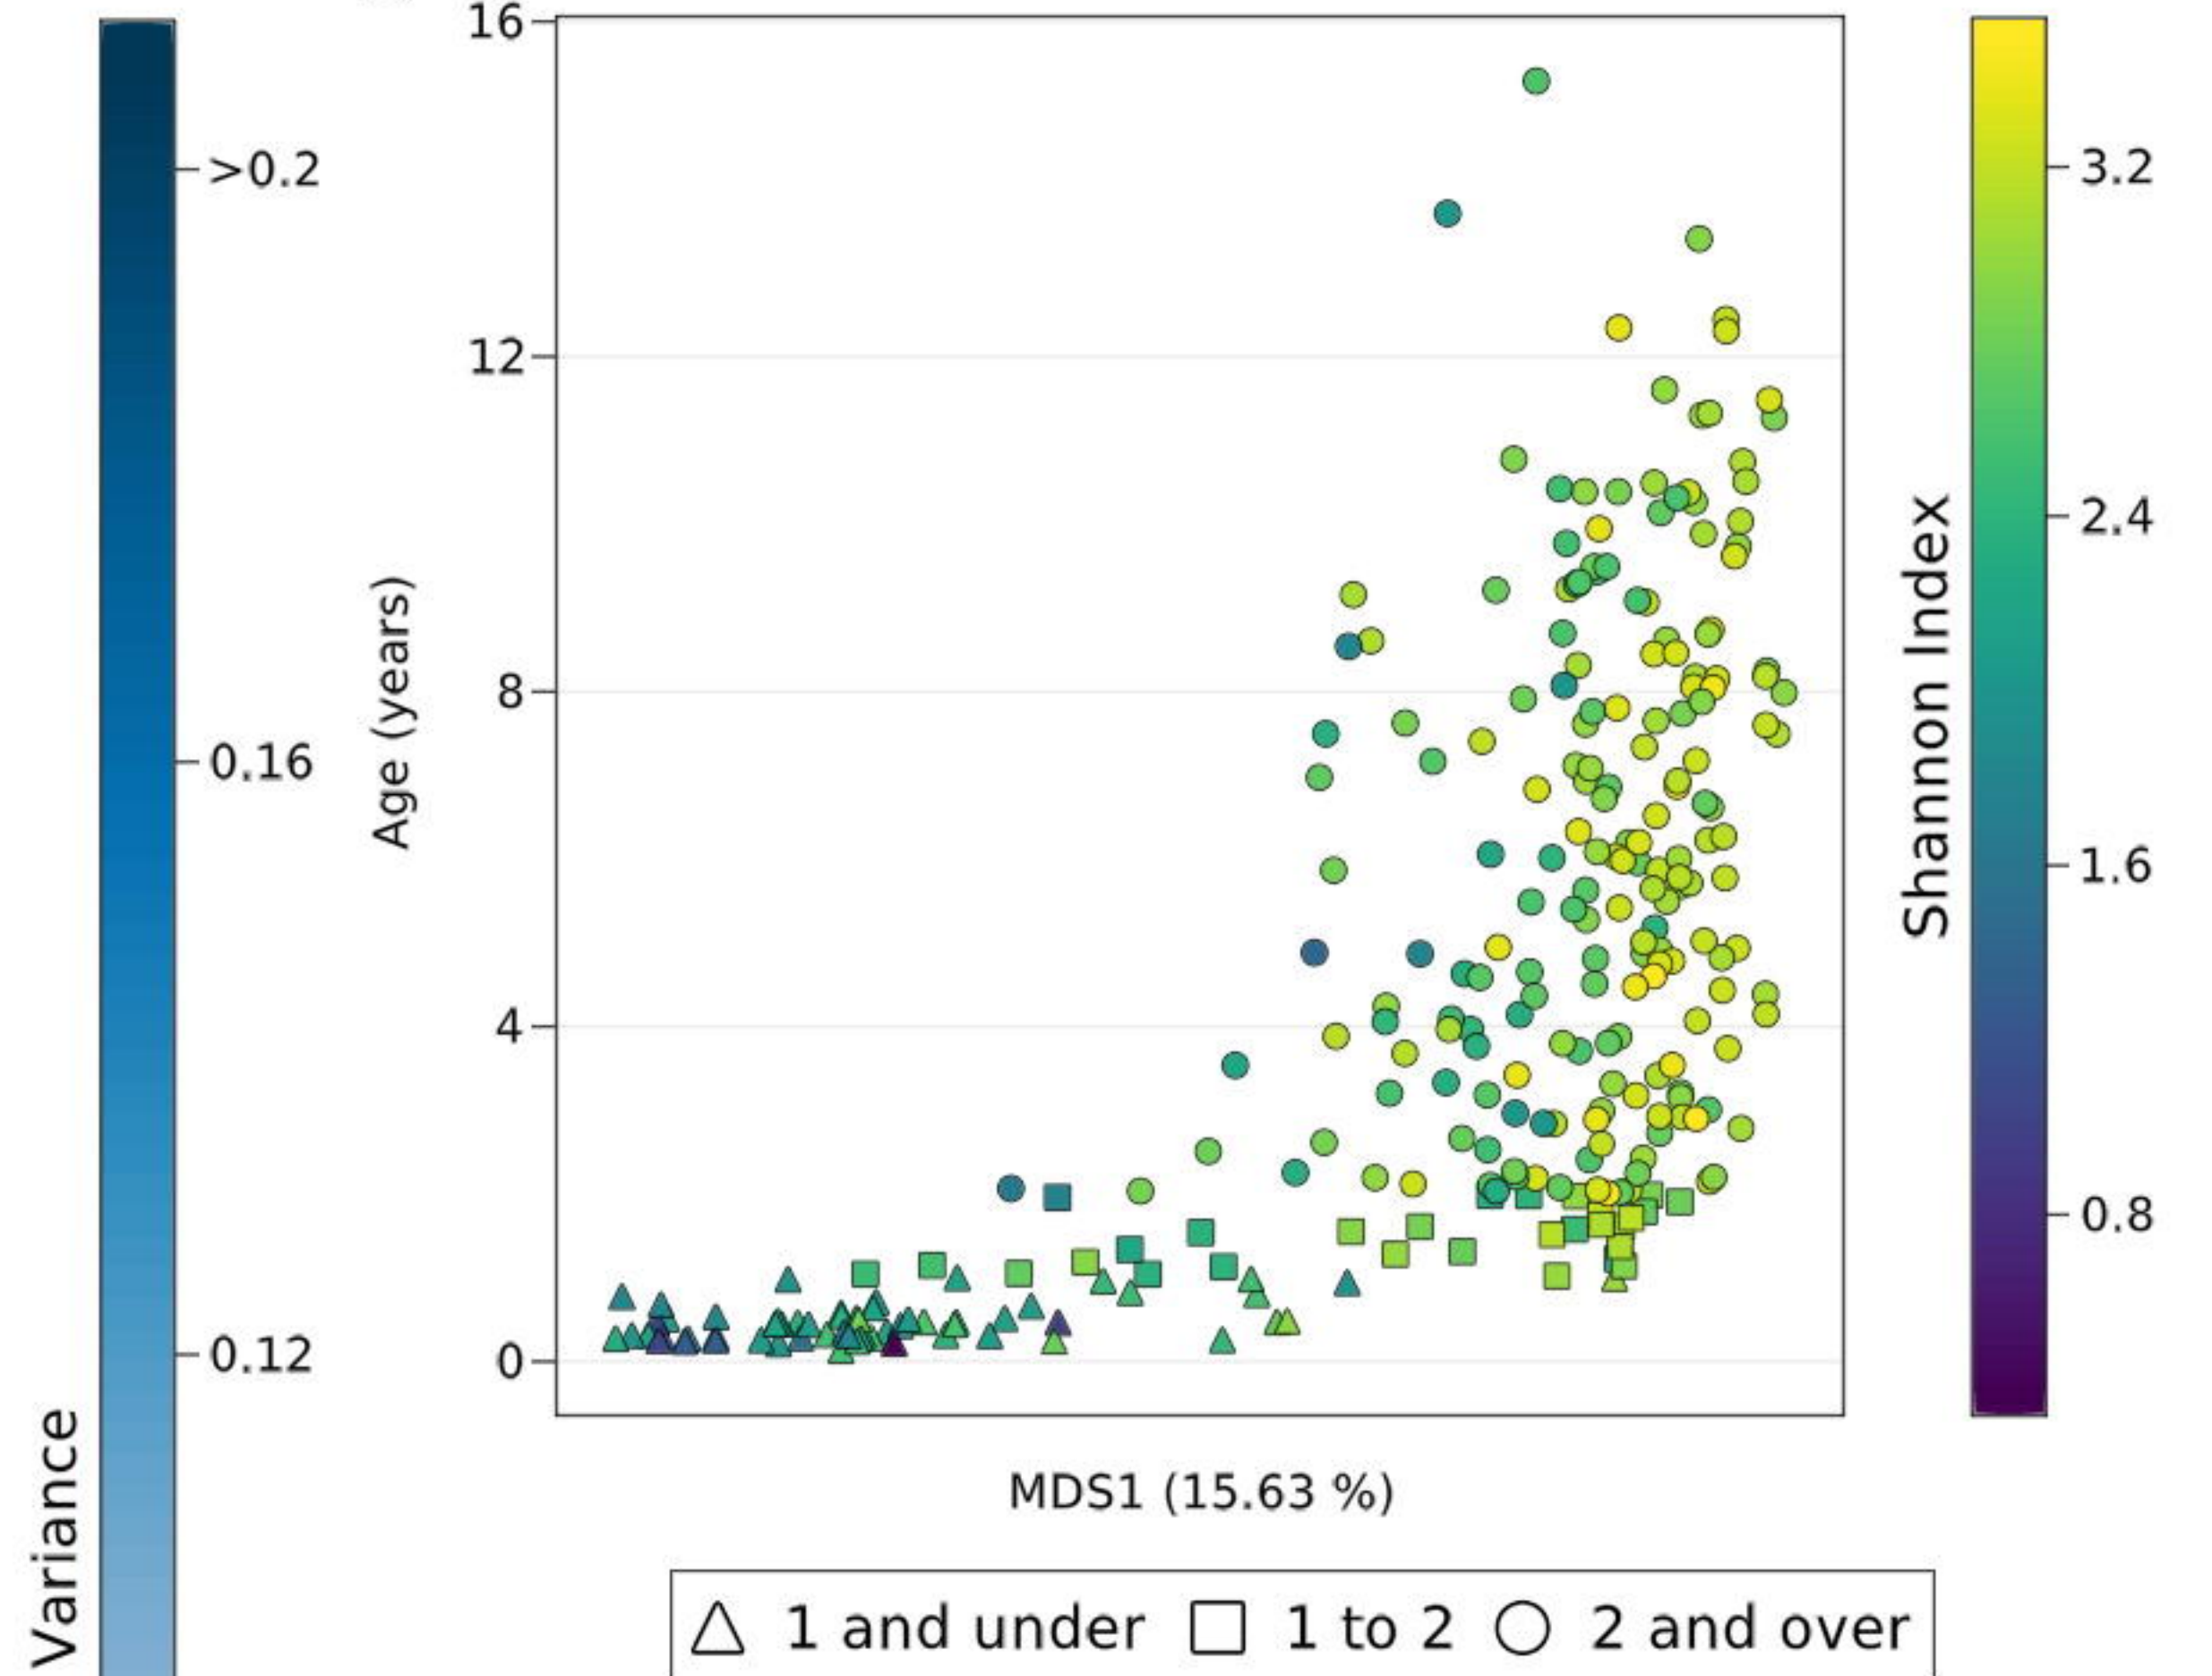

c

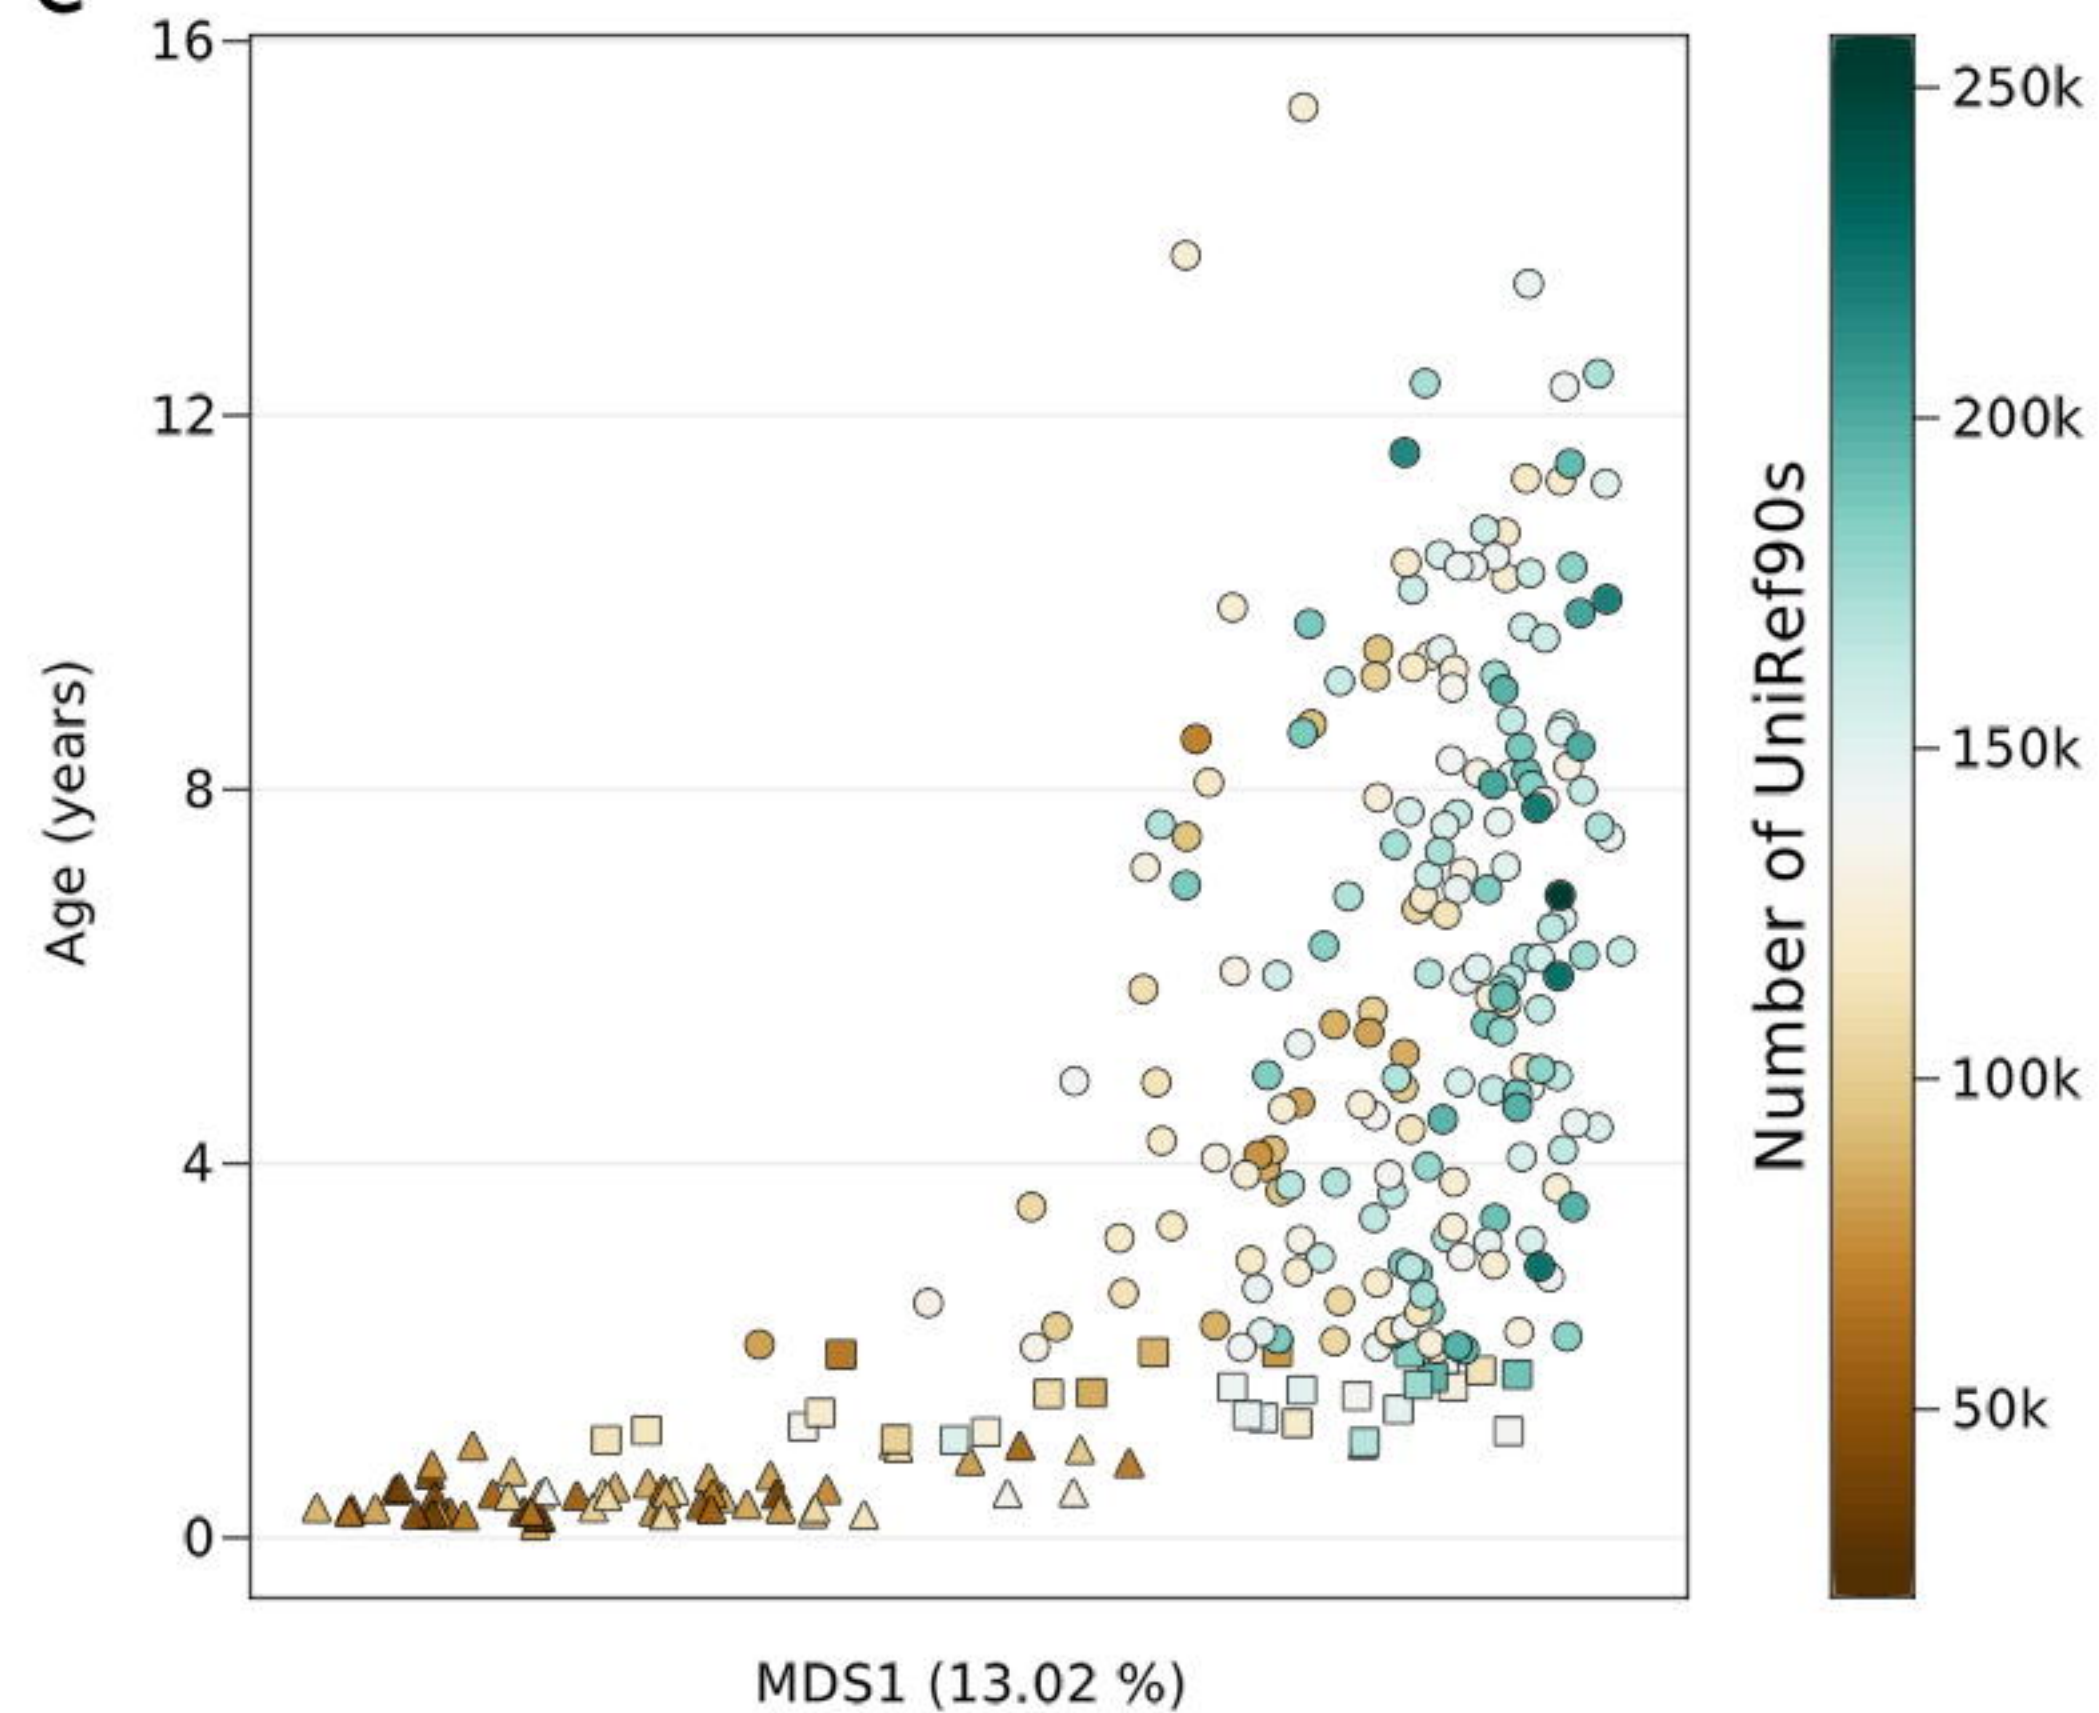



**a**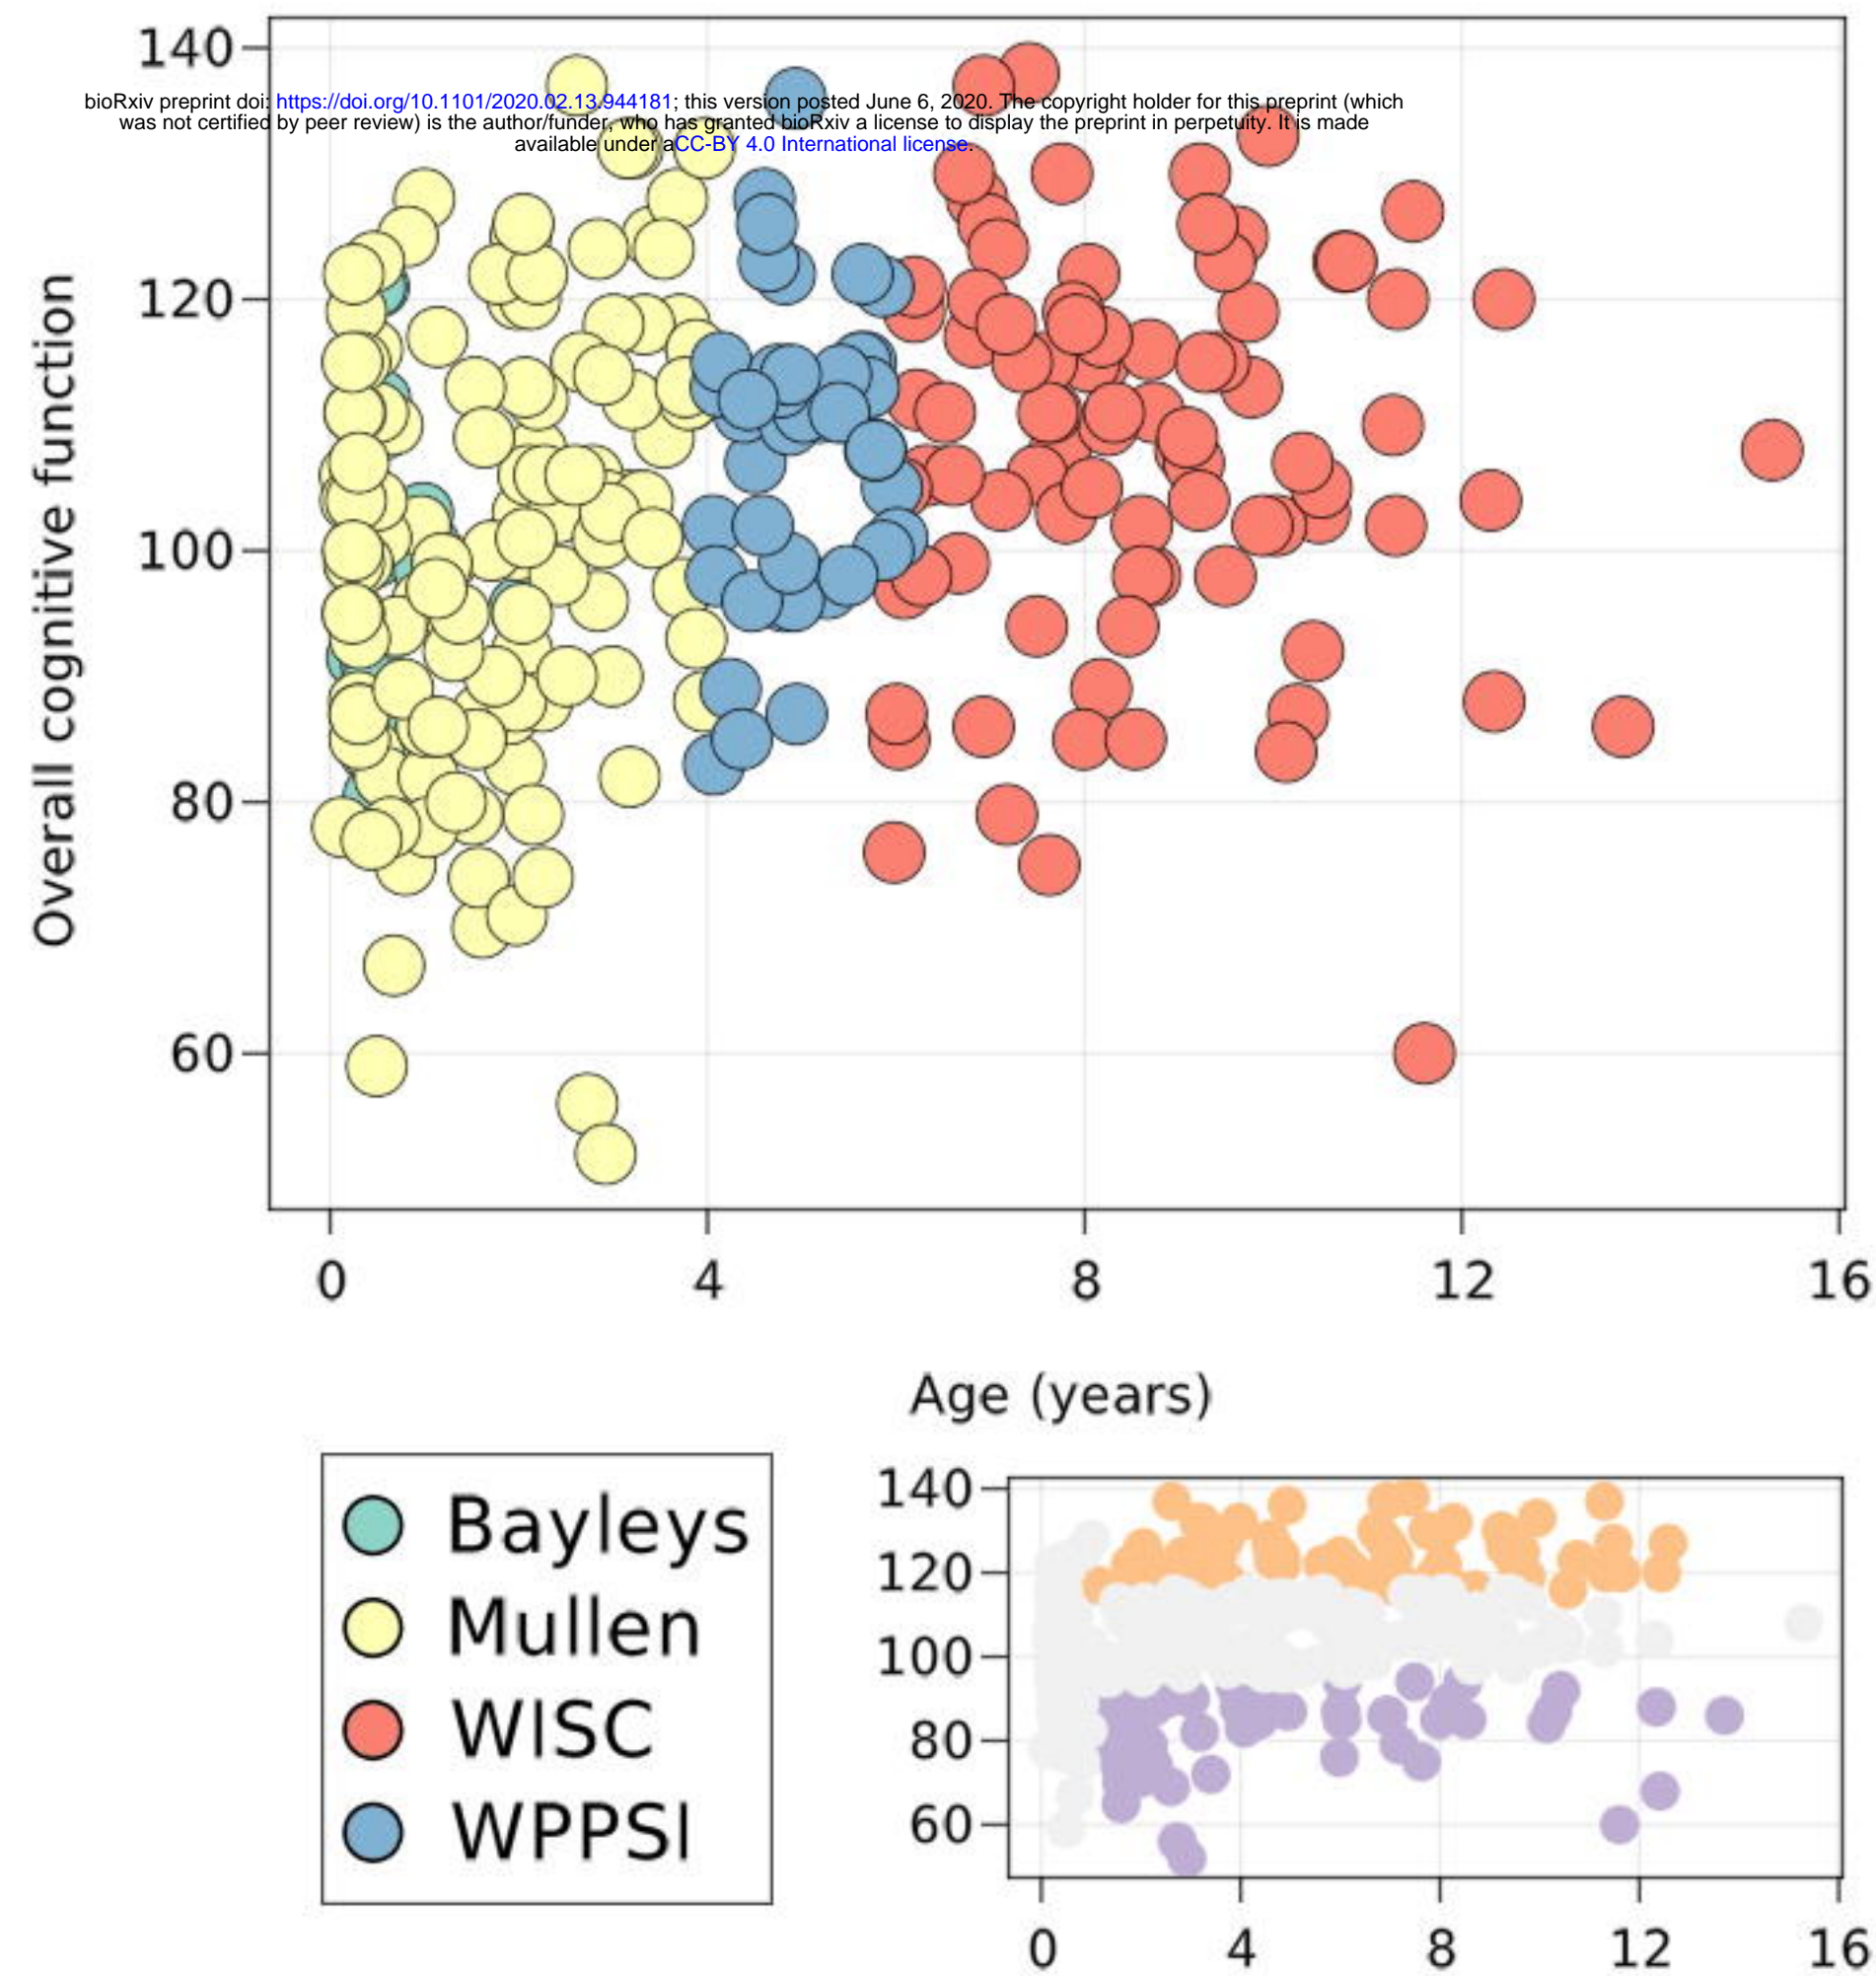**b**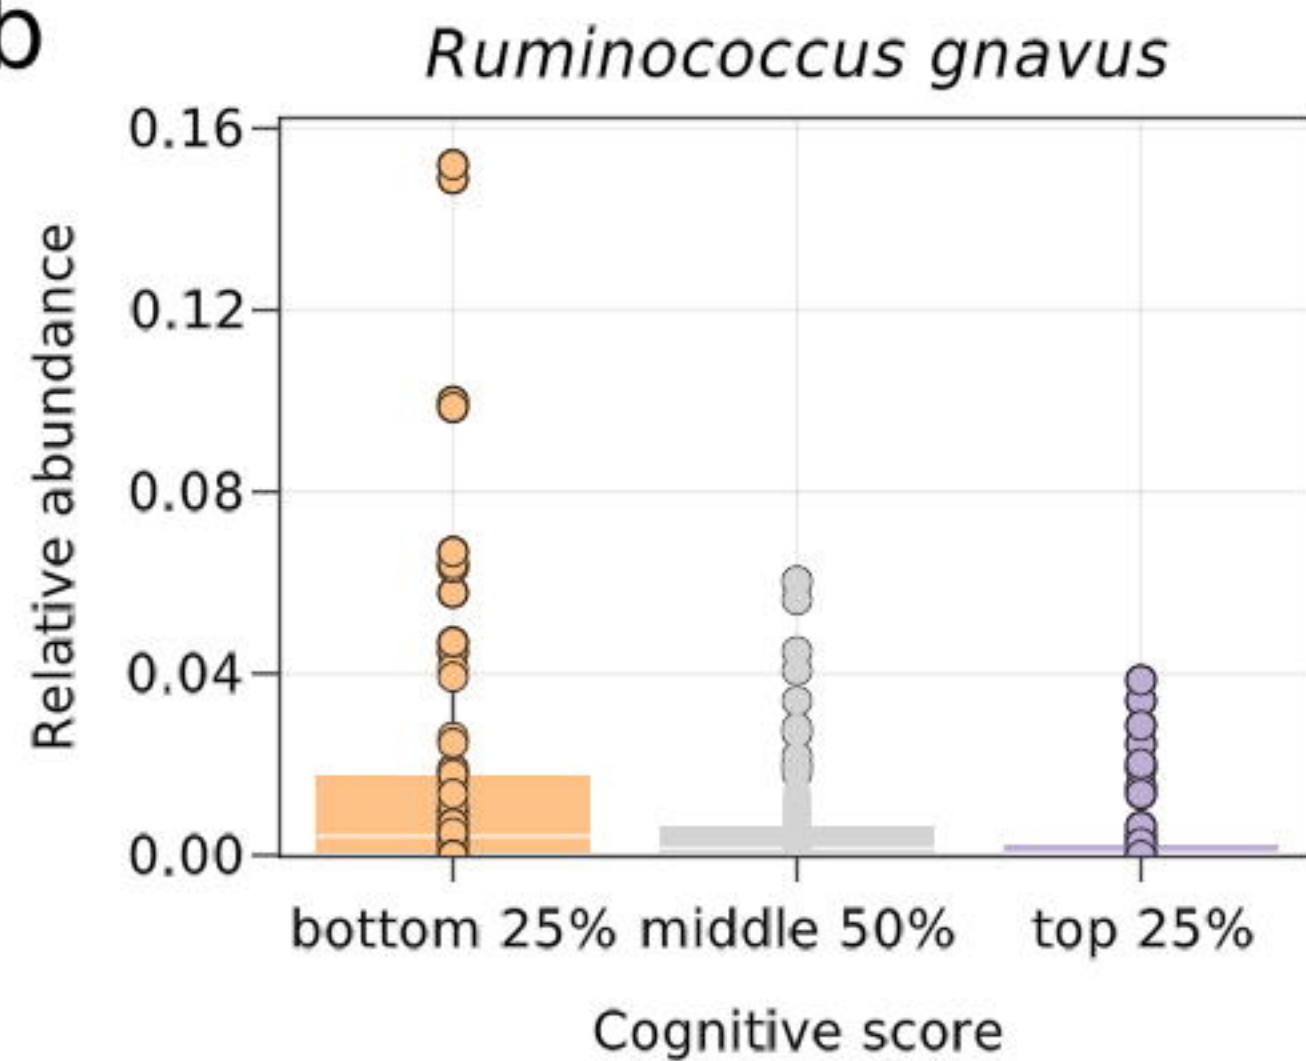**c**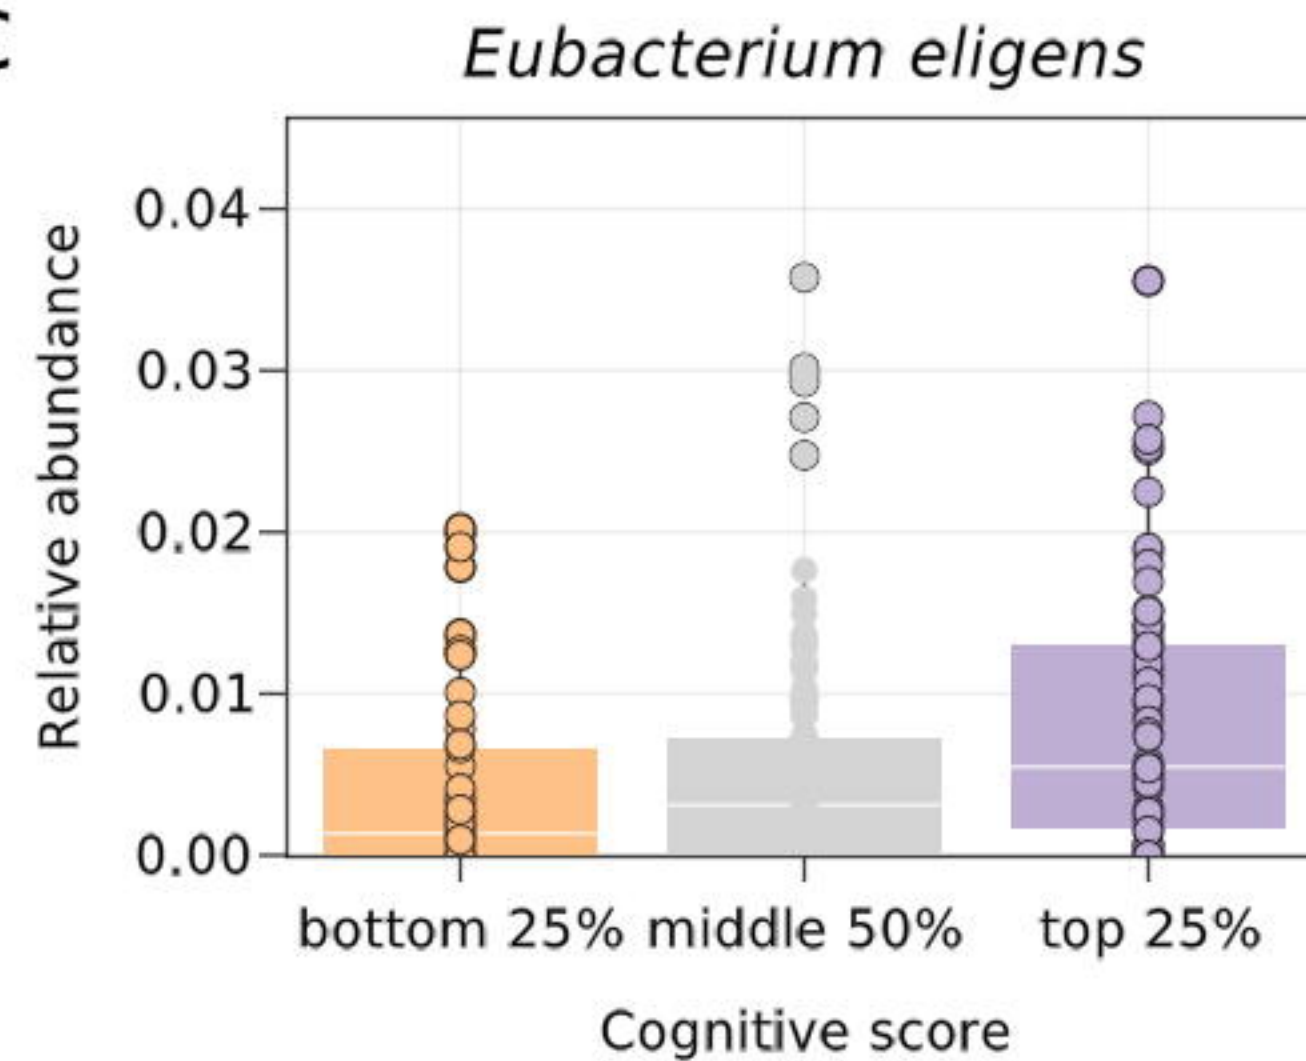**d**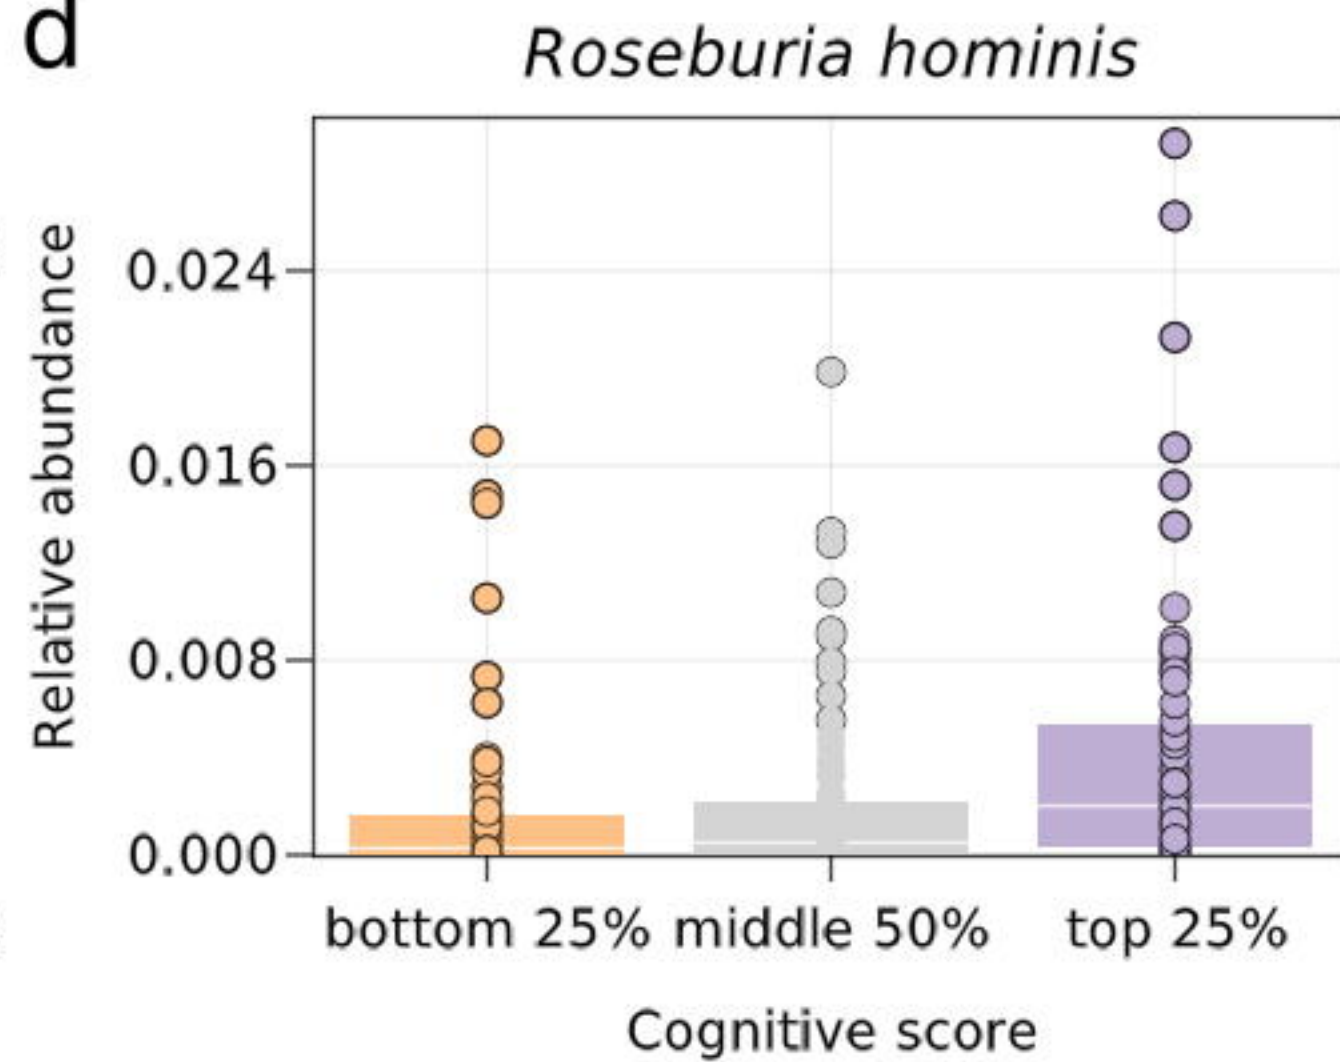**e**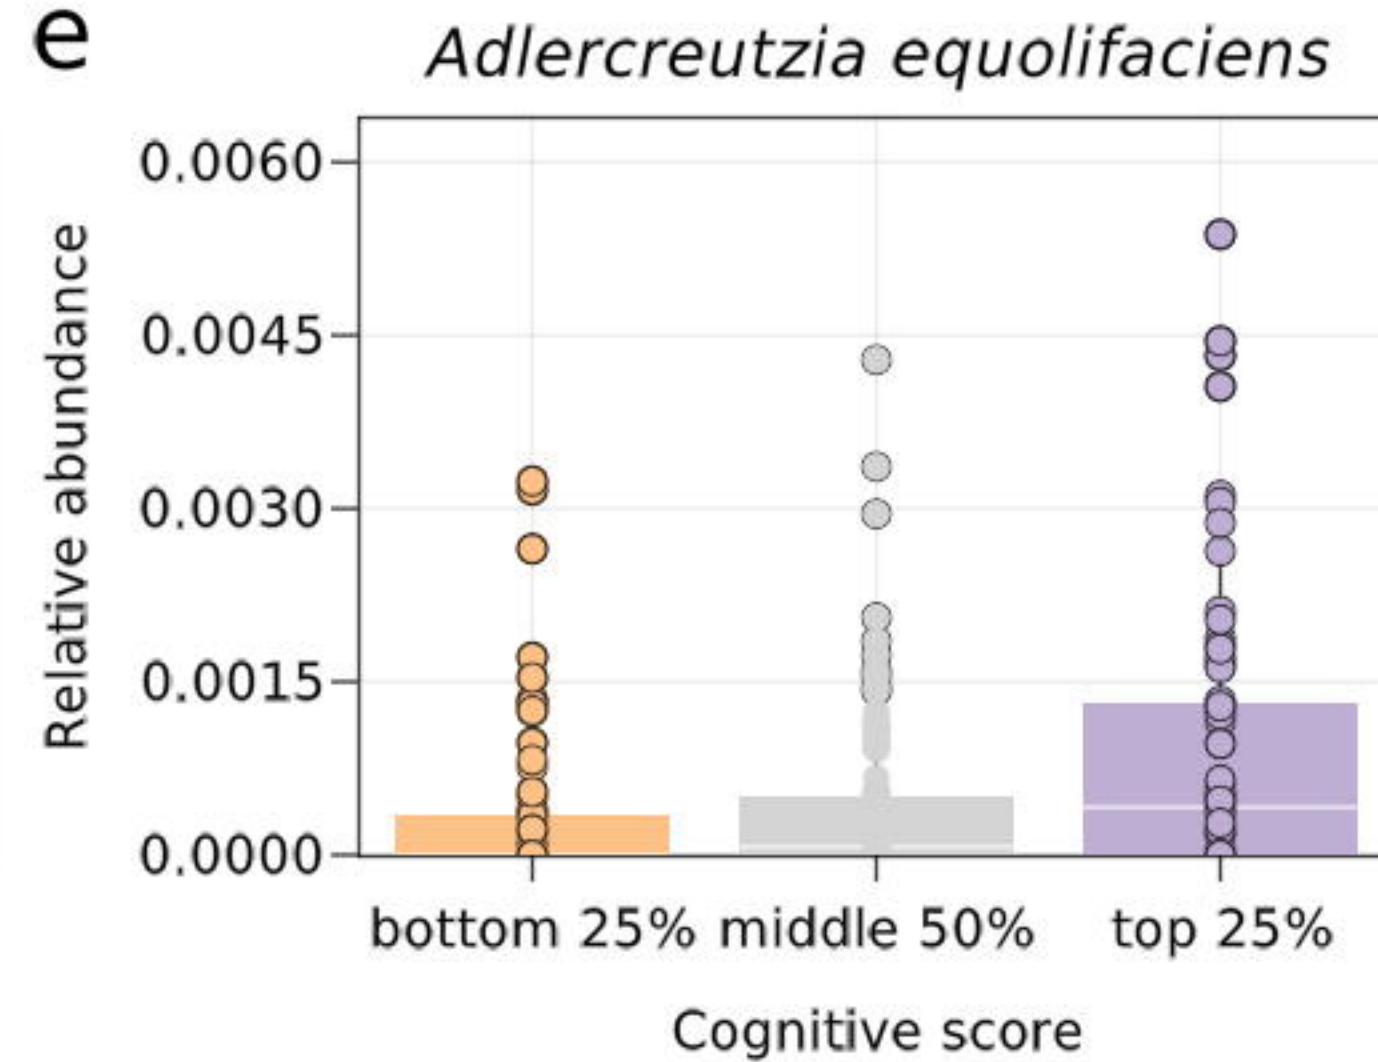

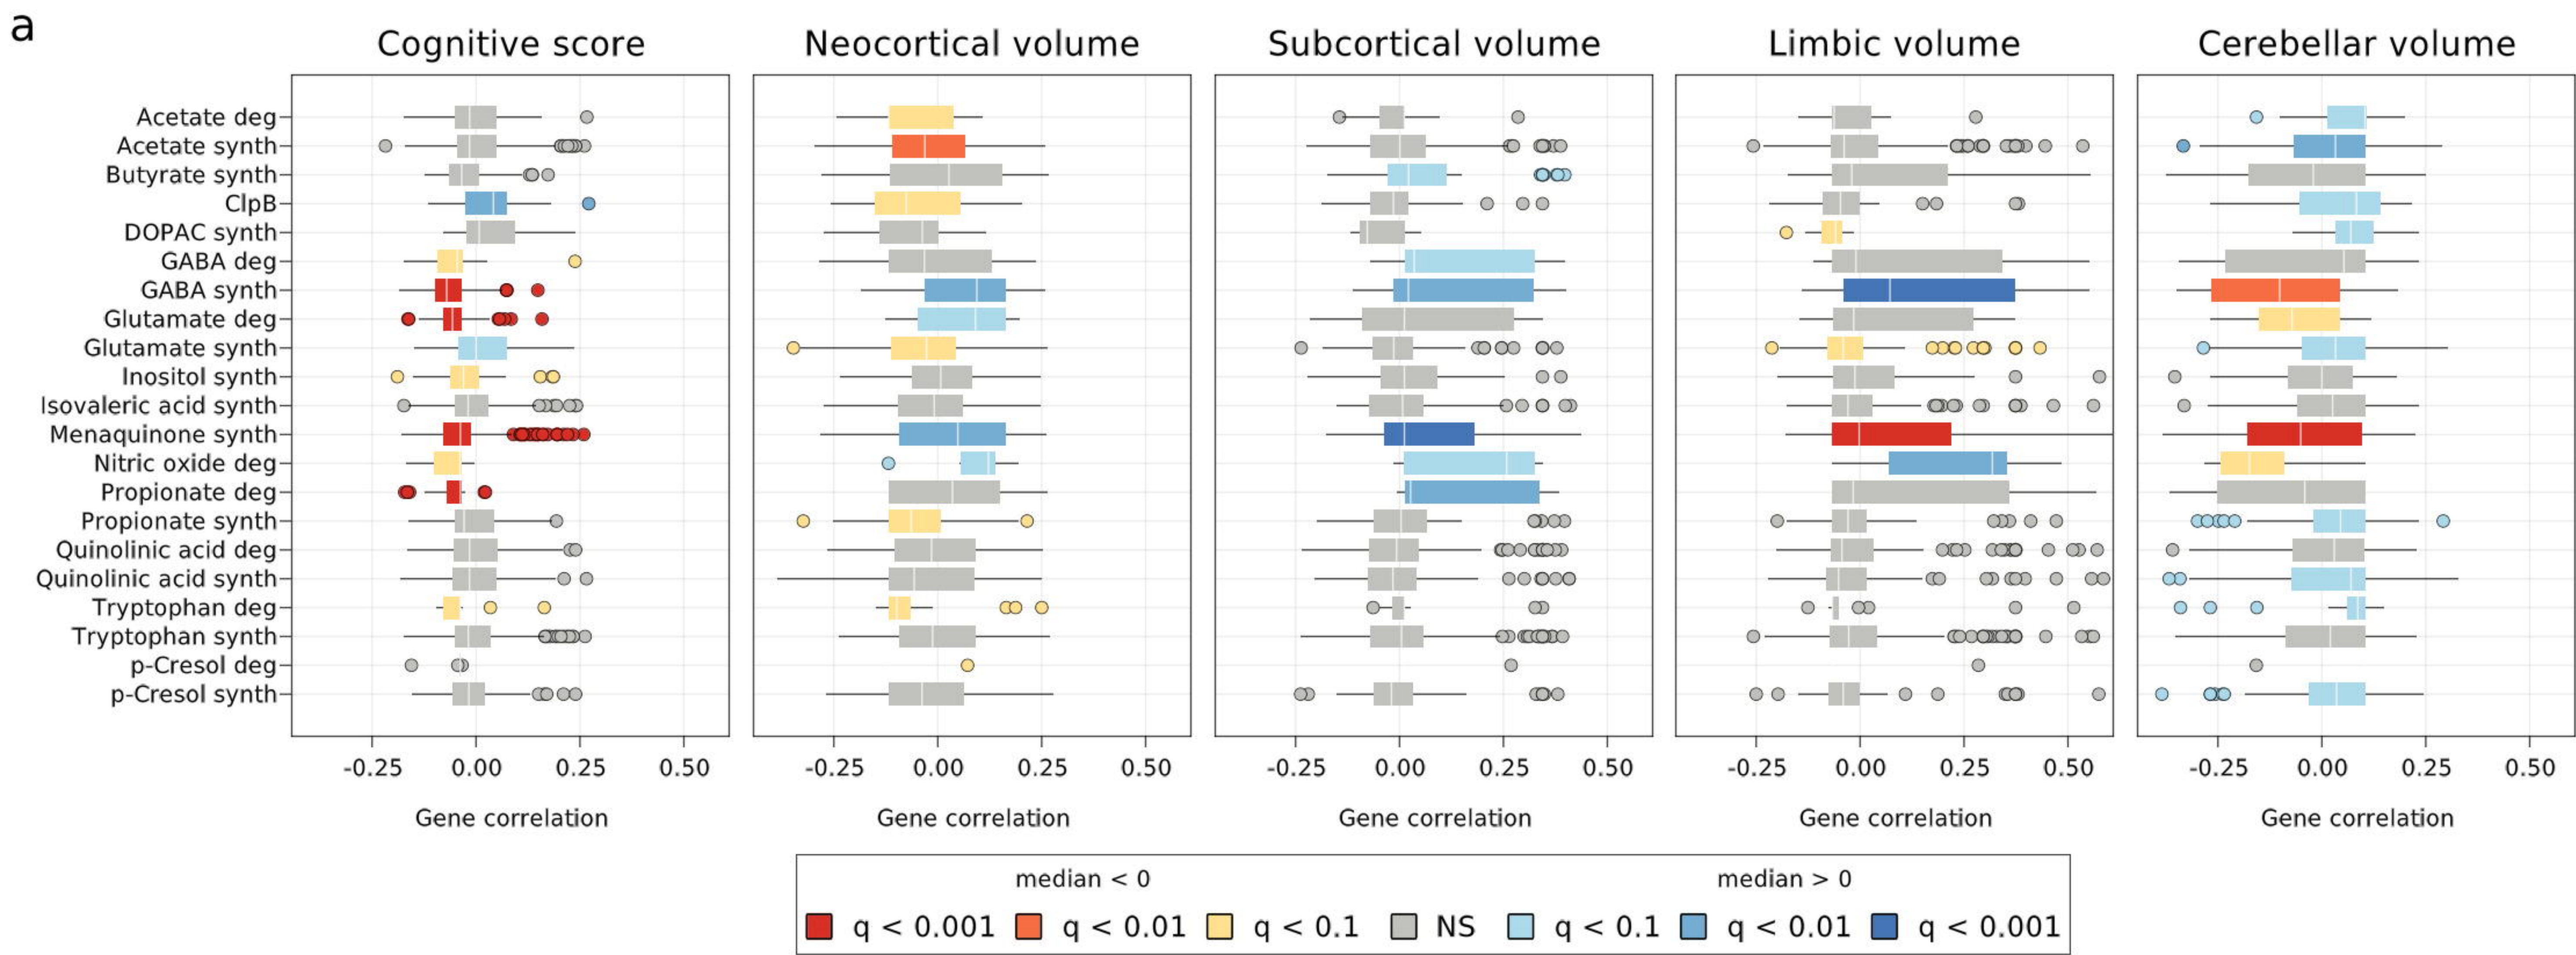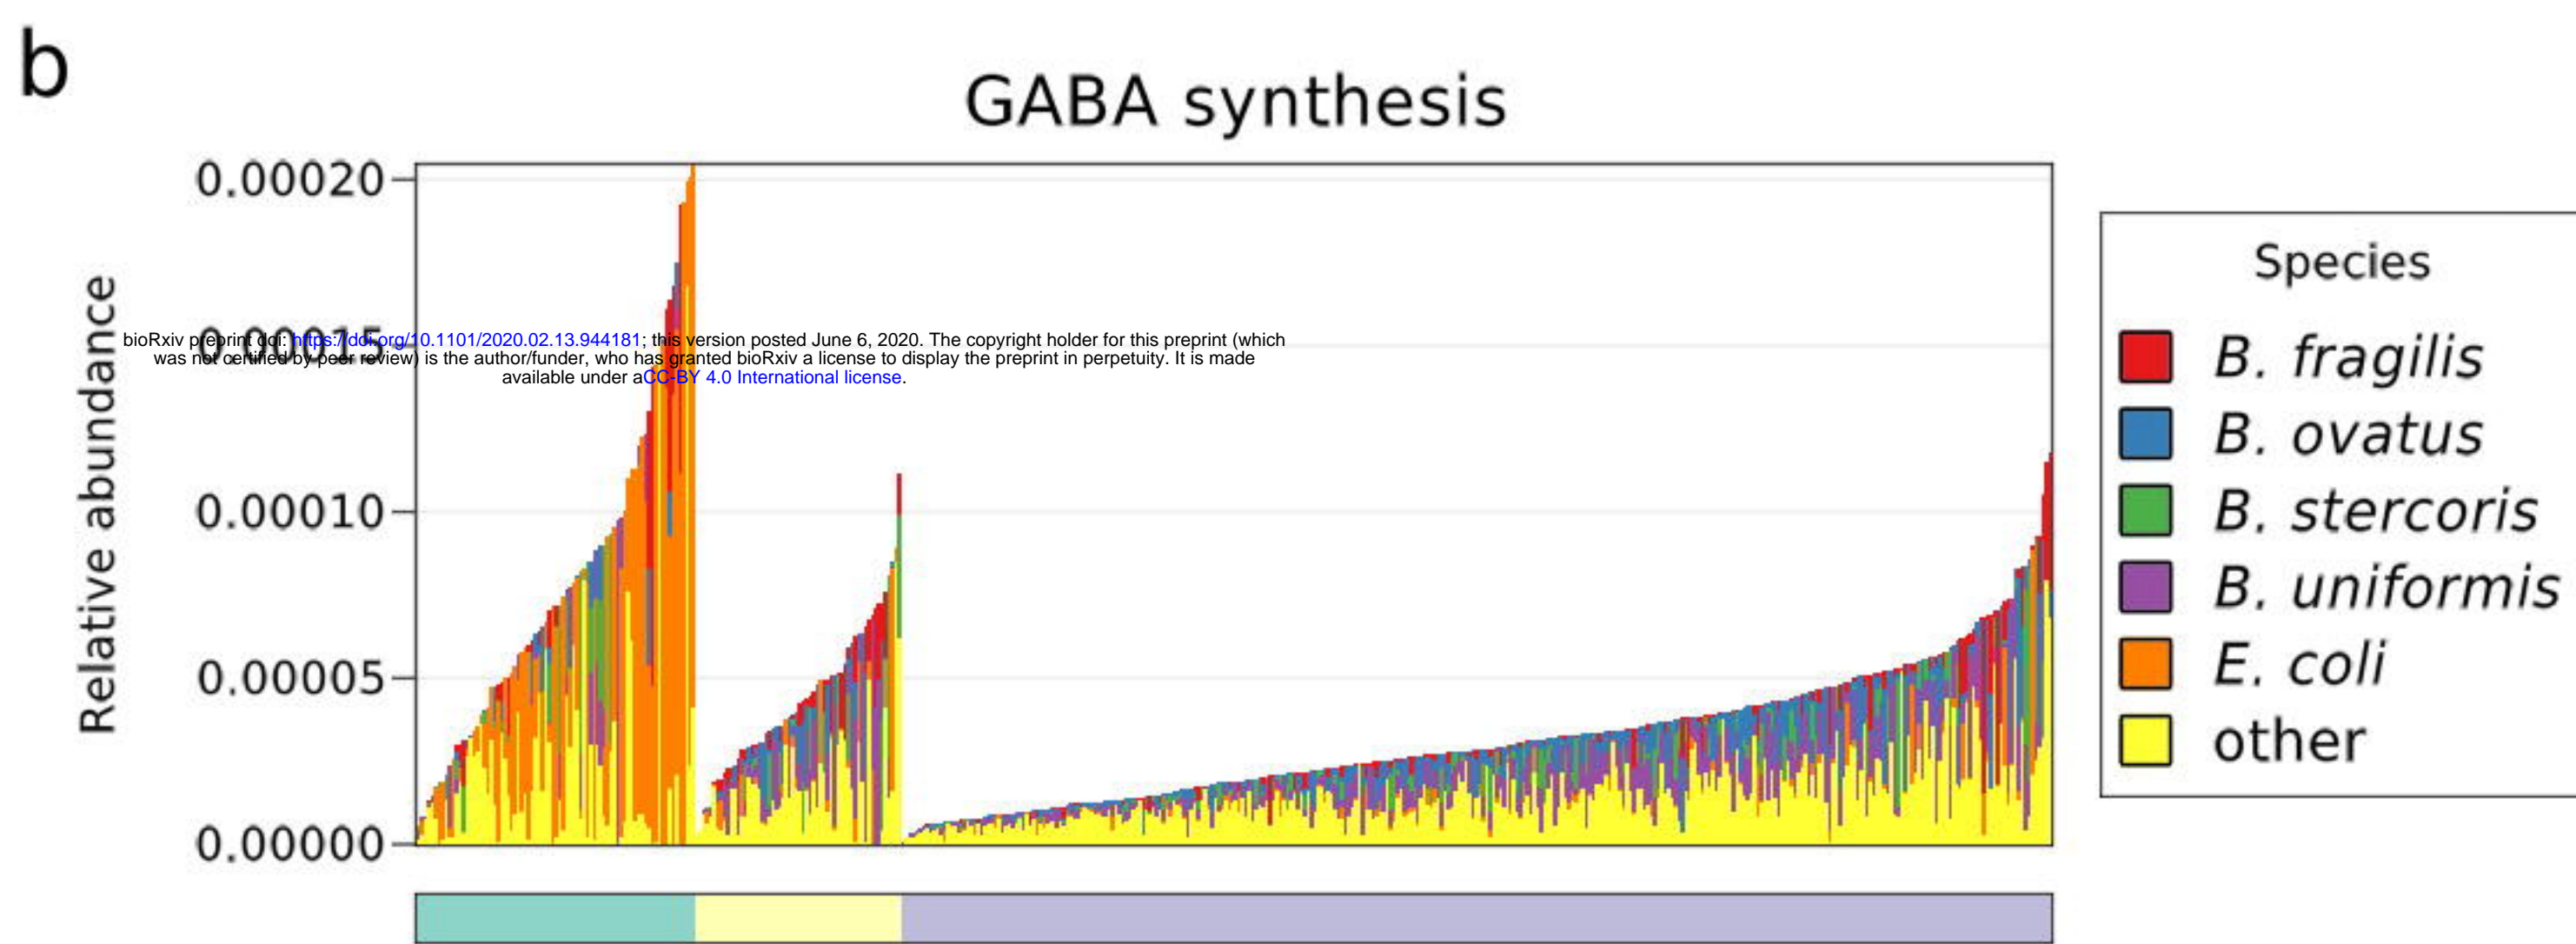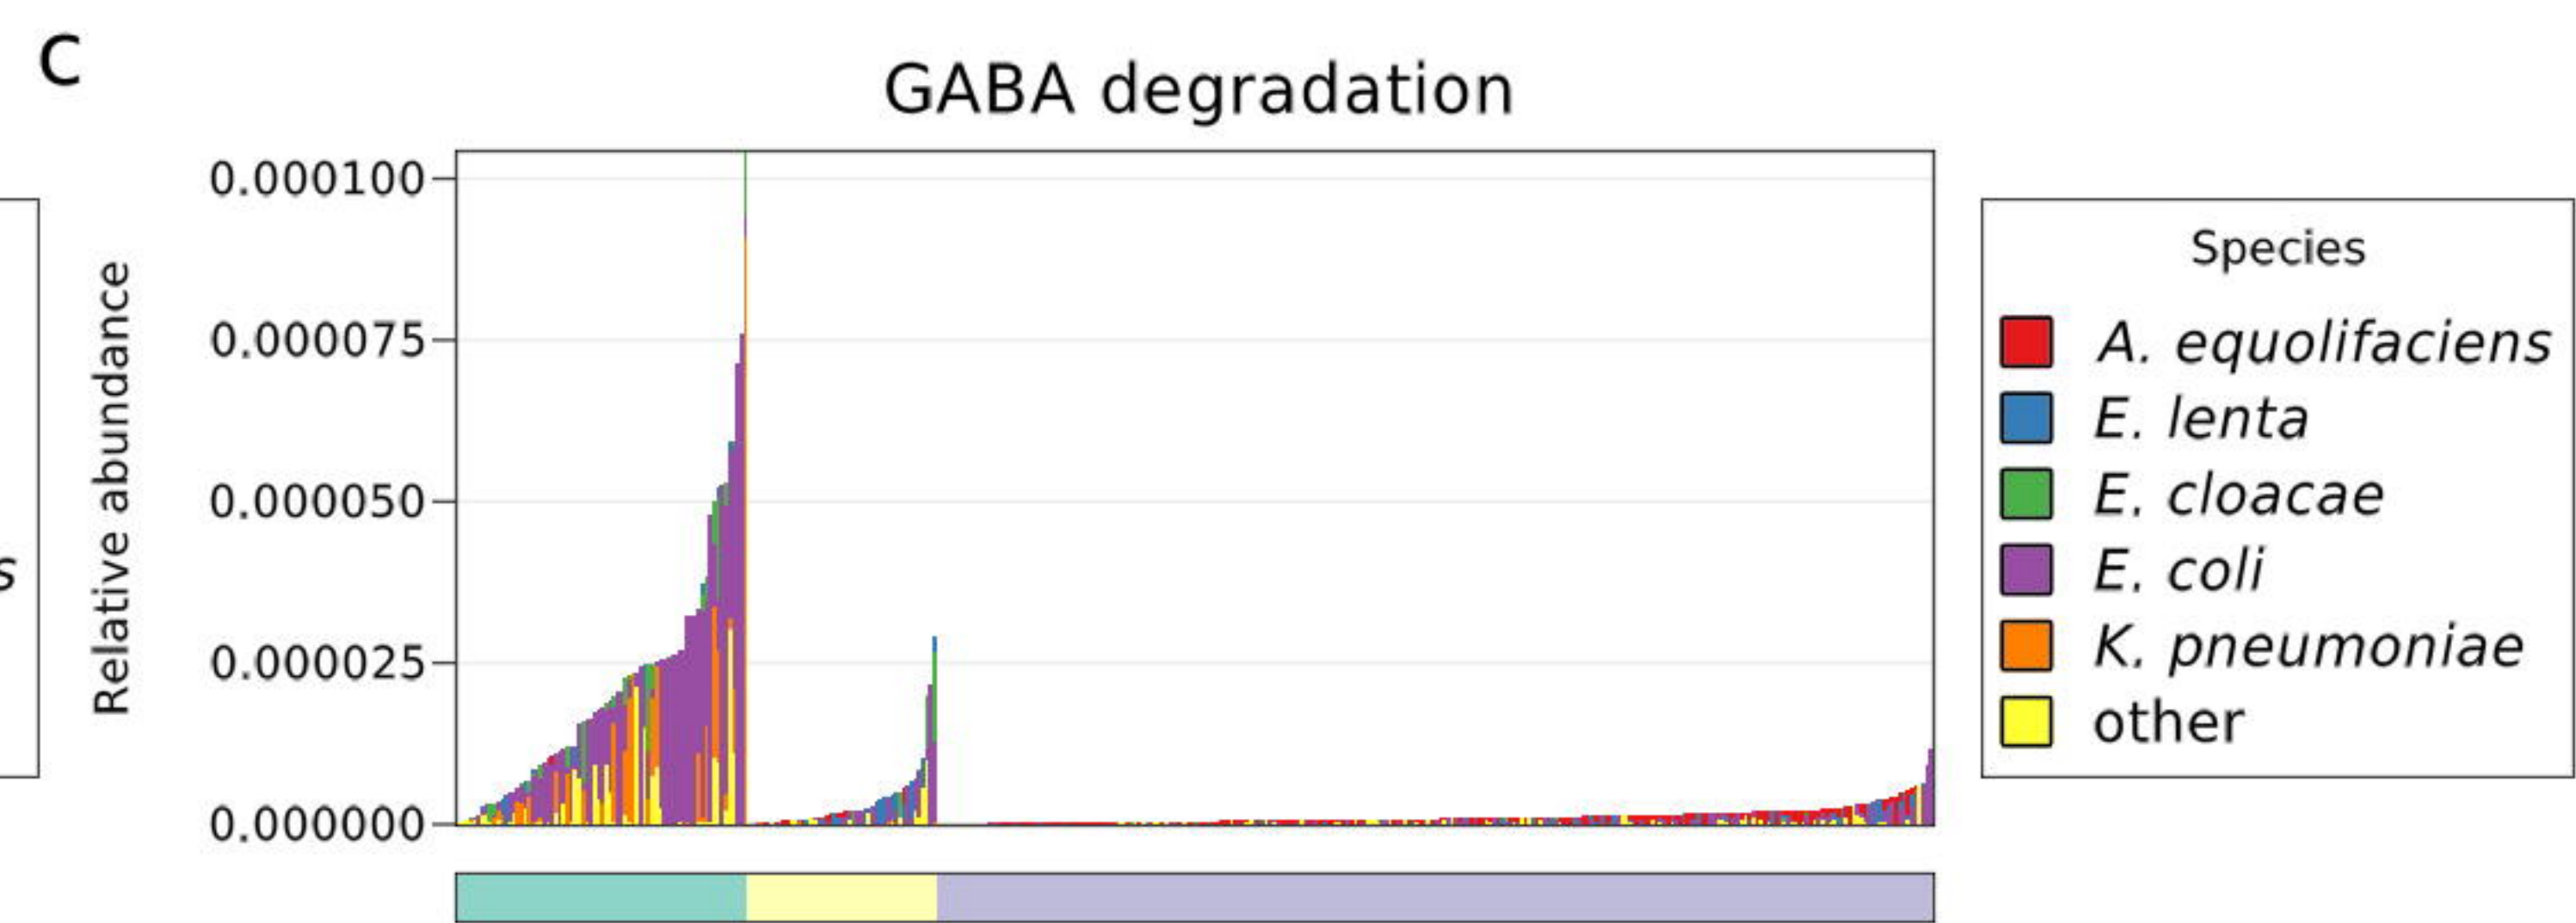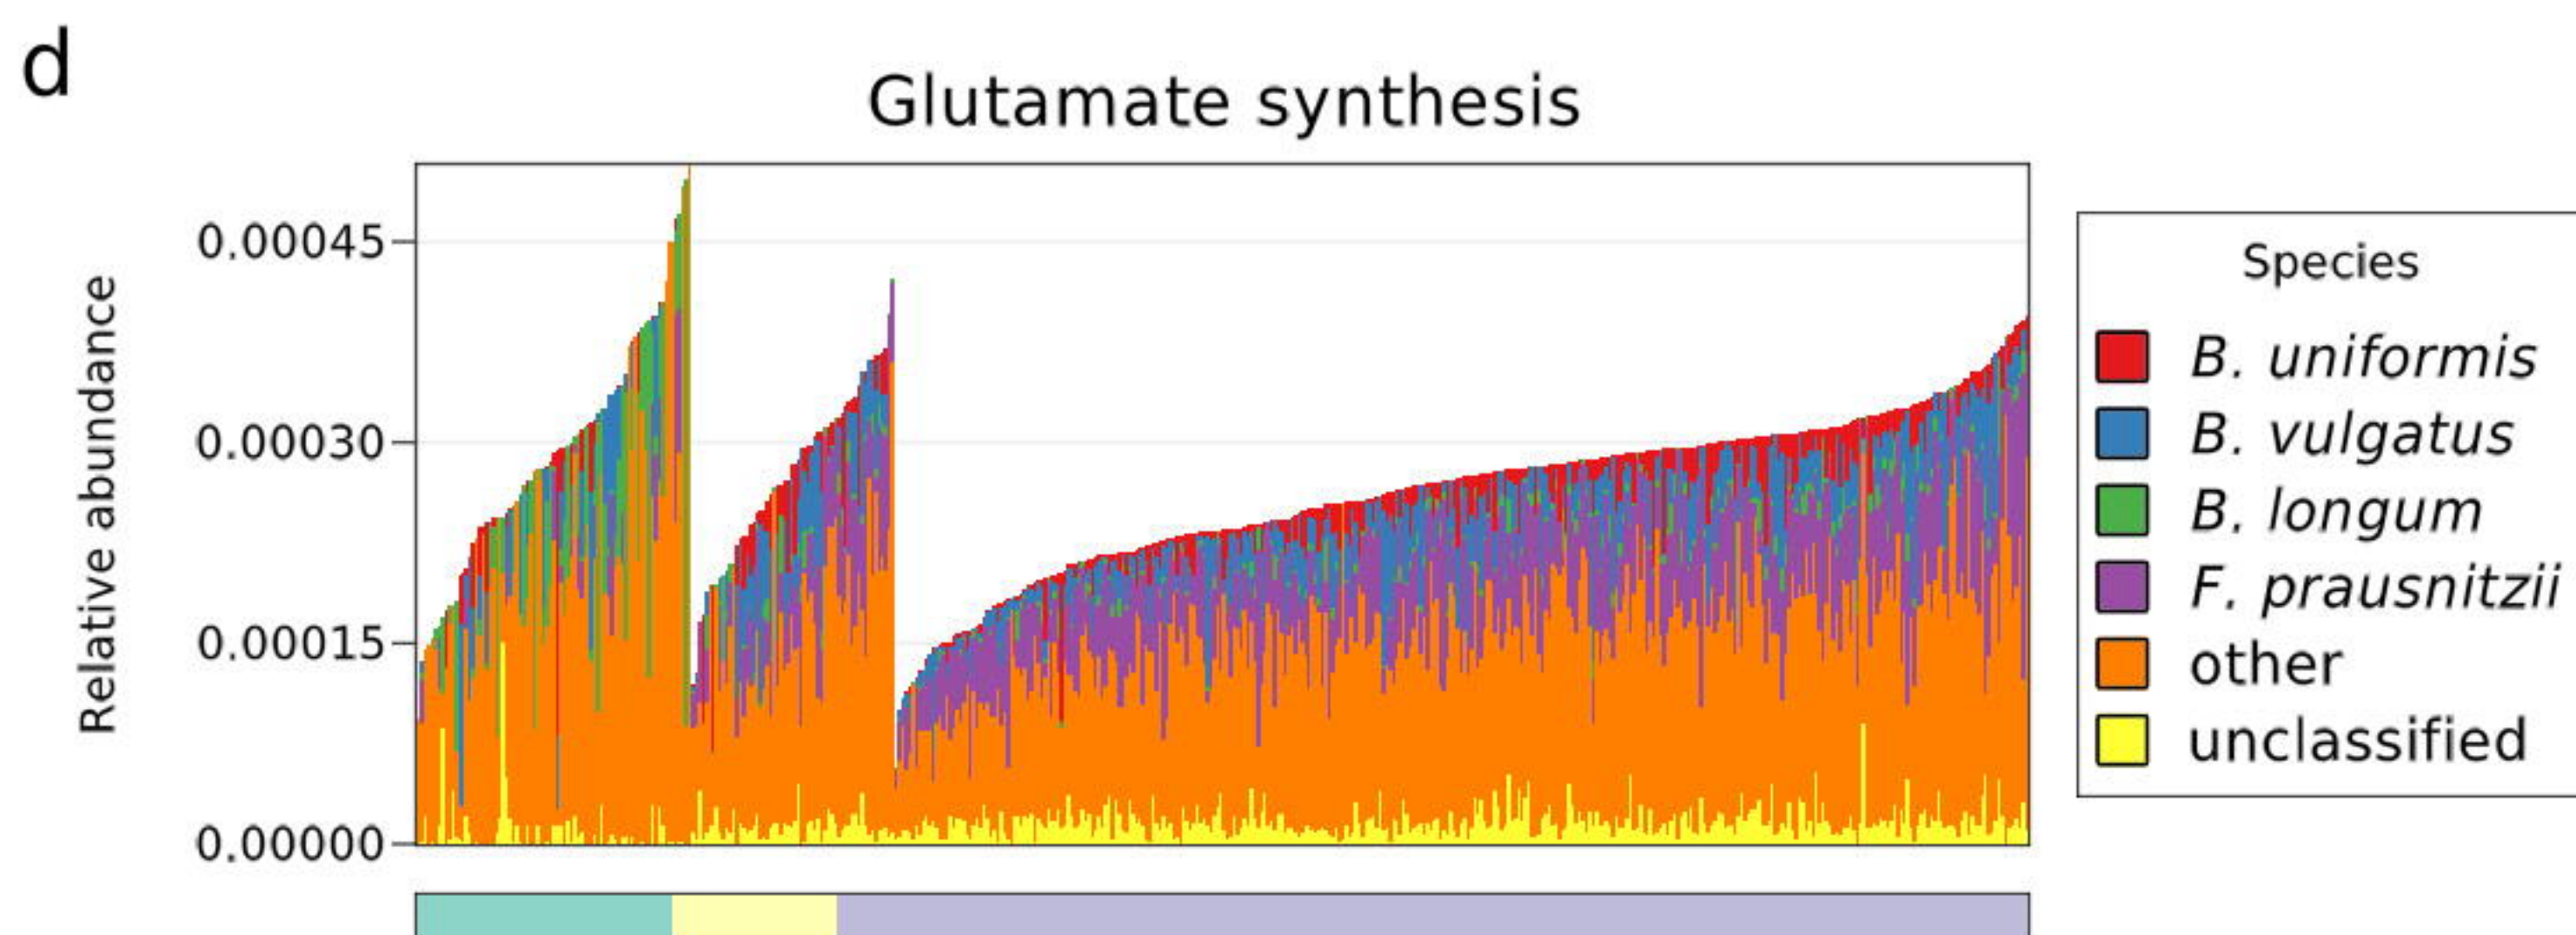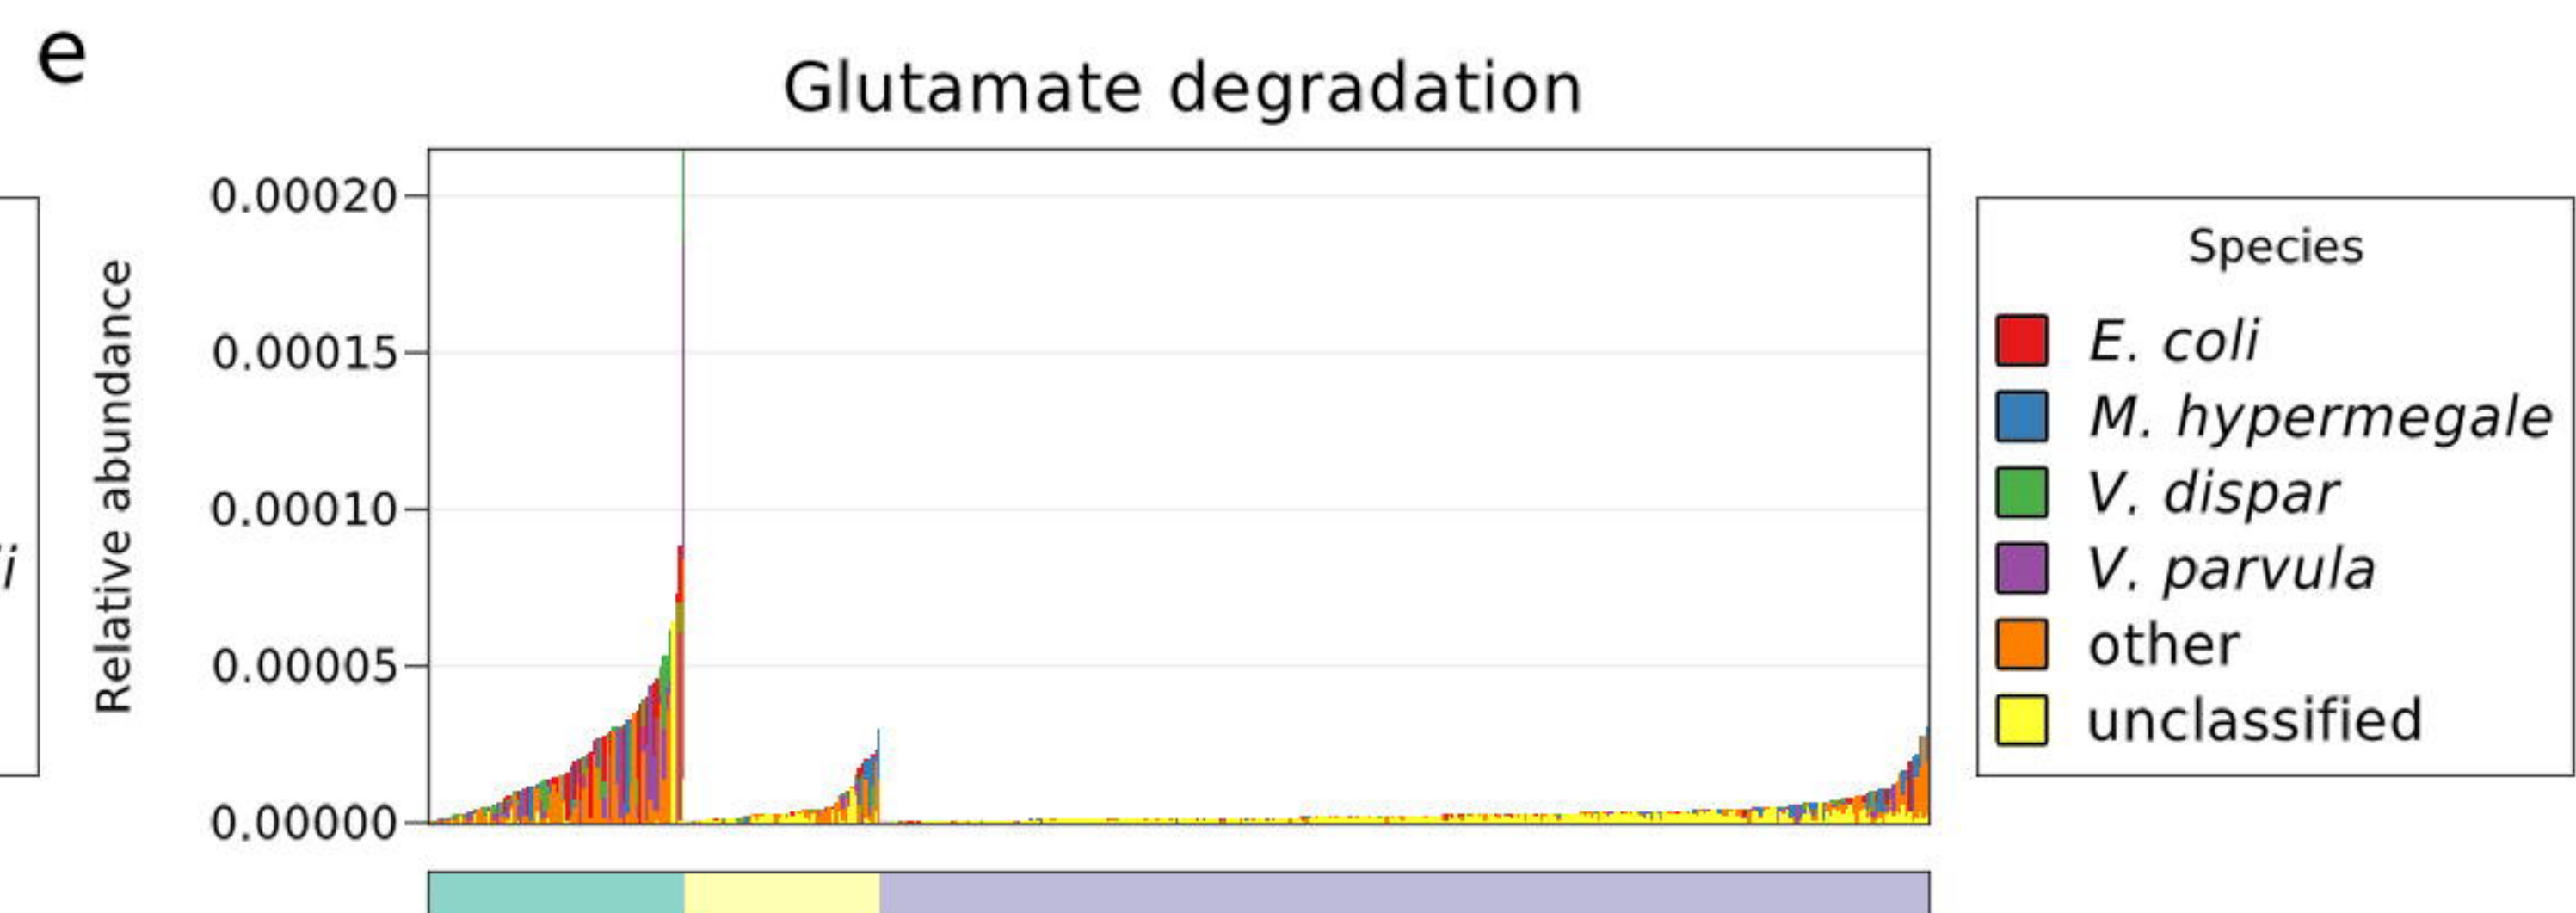

■ 1 and under   ■ 1 to 2   ■ 2 and over
